# Supplementary material for: Scaling dictates the decoder structure
Source: bioRxiv or medRxiv preprint supplement (doi:10.1101/2021.03.04.433820), 2021-11-21

**Fig. S1**

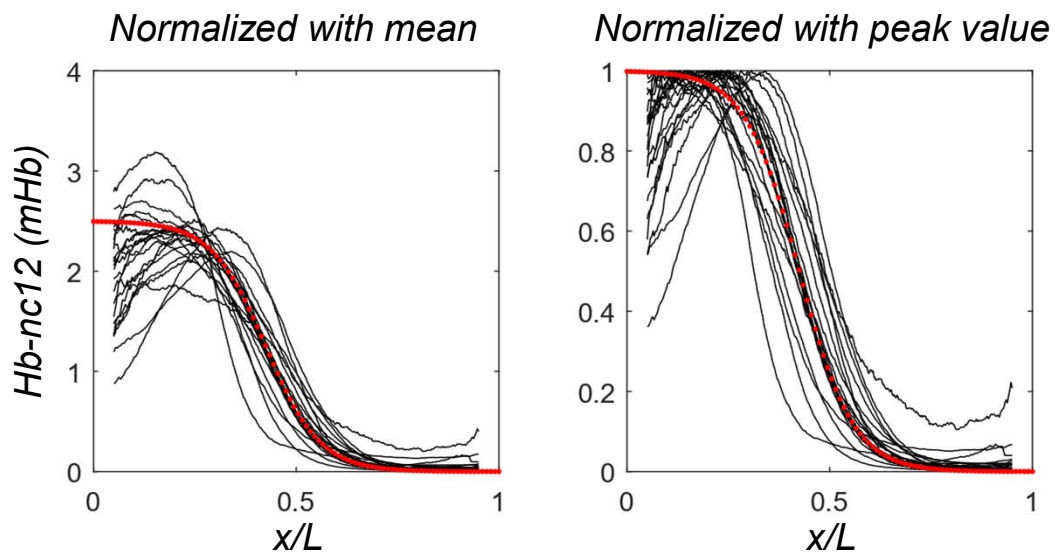

**Fig. S2**

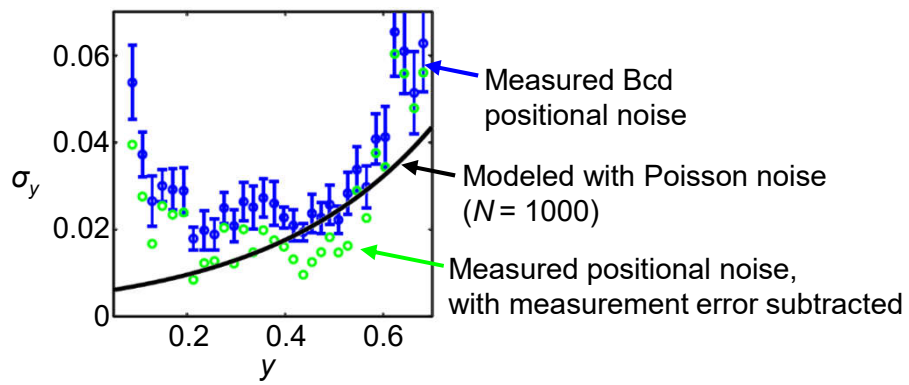

**Fig. S3**

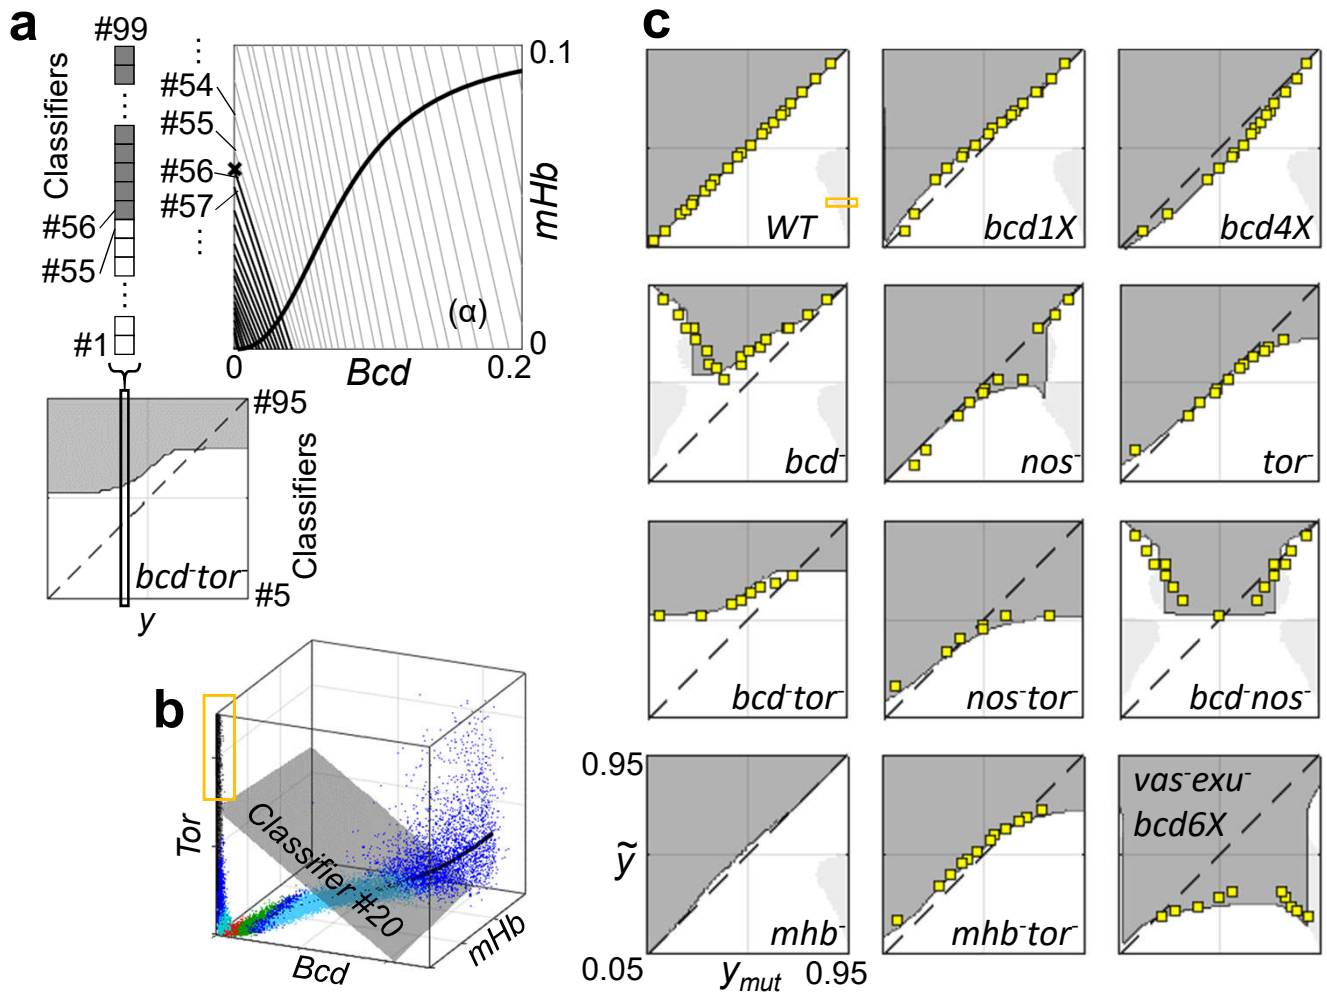

**Fig. S4**

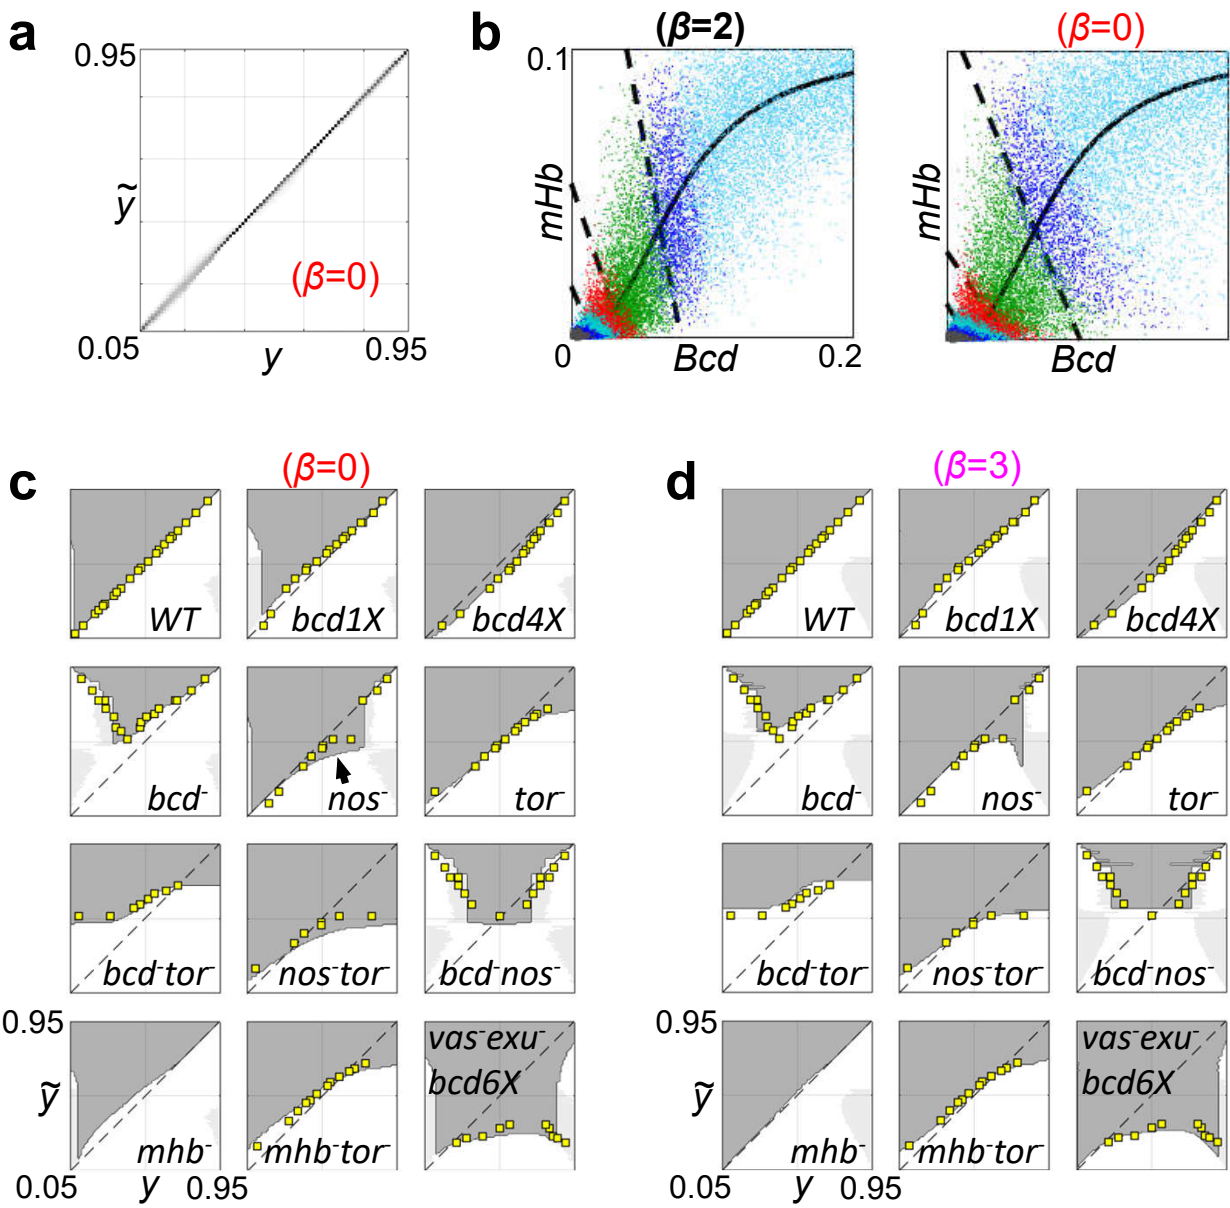

**Fig. S4-continued**

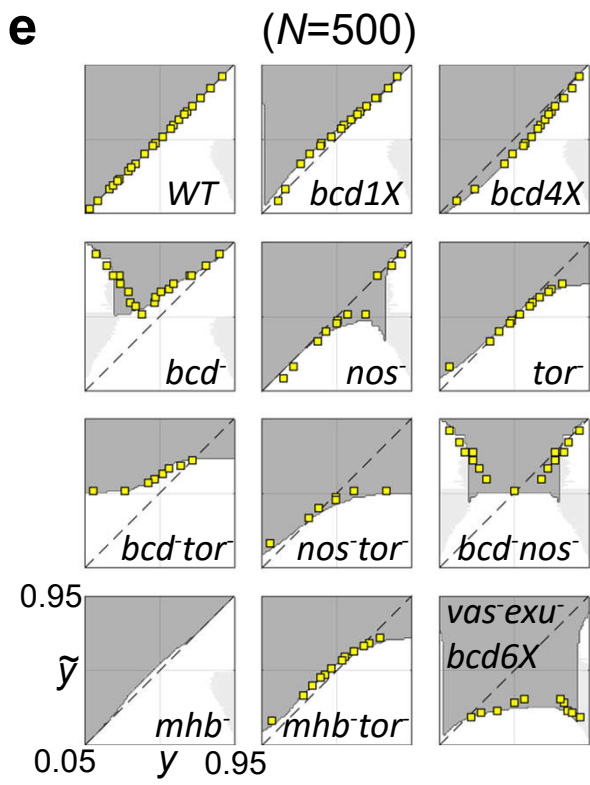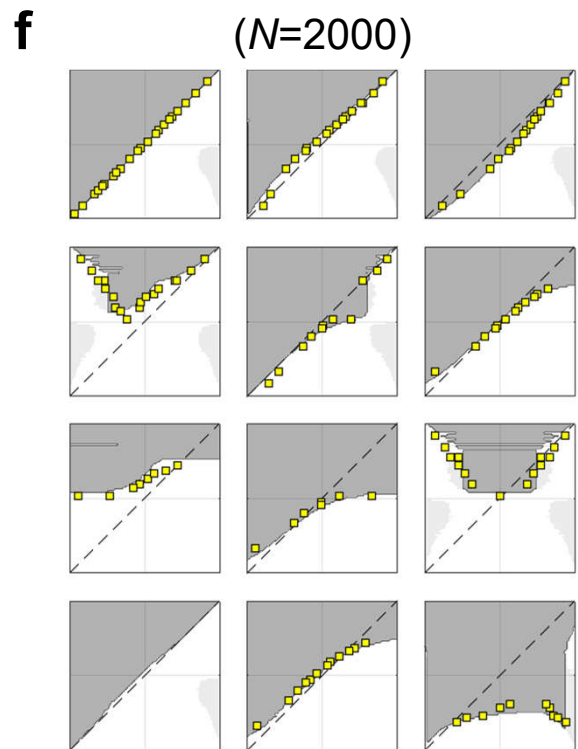

**Fig. S5**

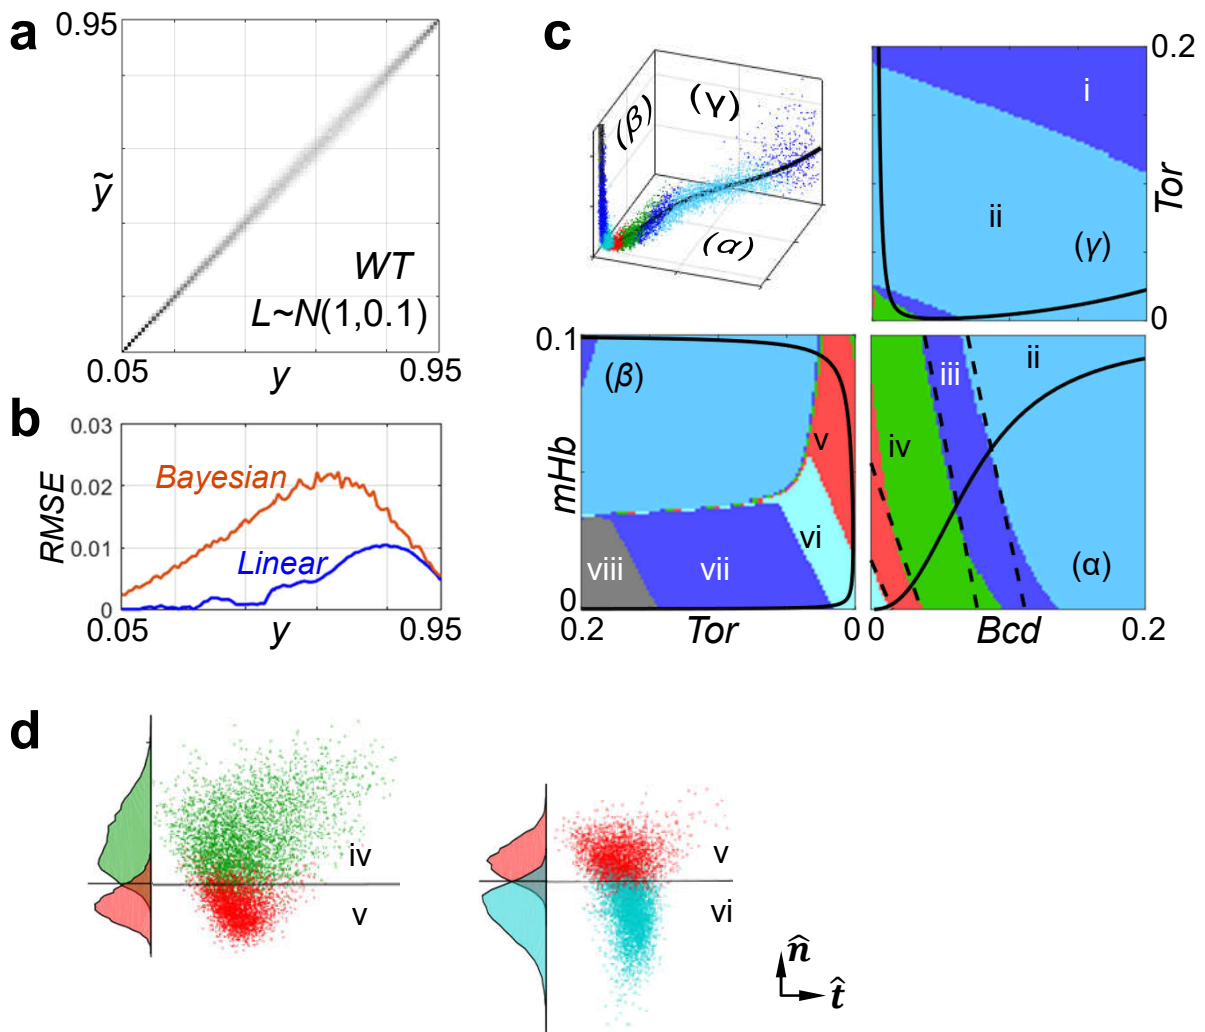

**Fig. S6**

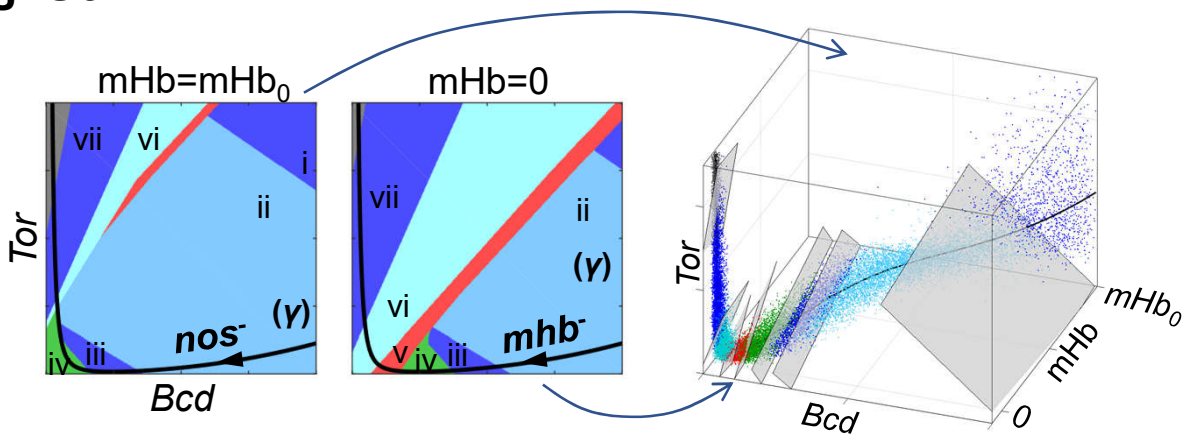

**Fig. S7**

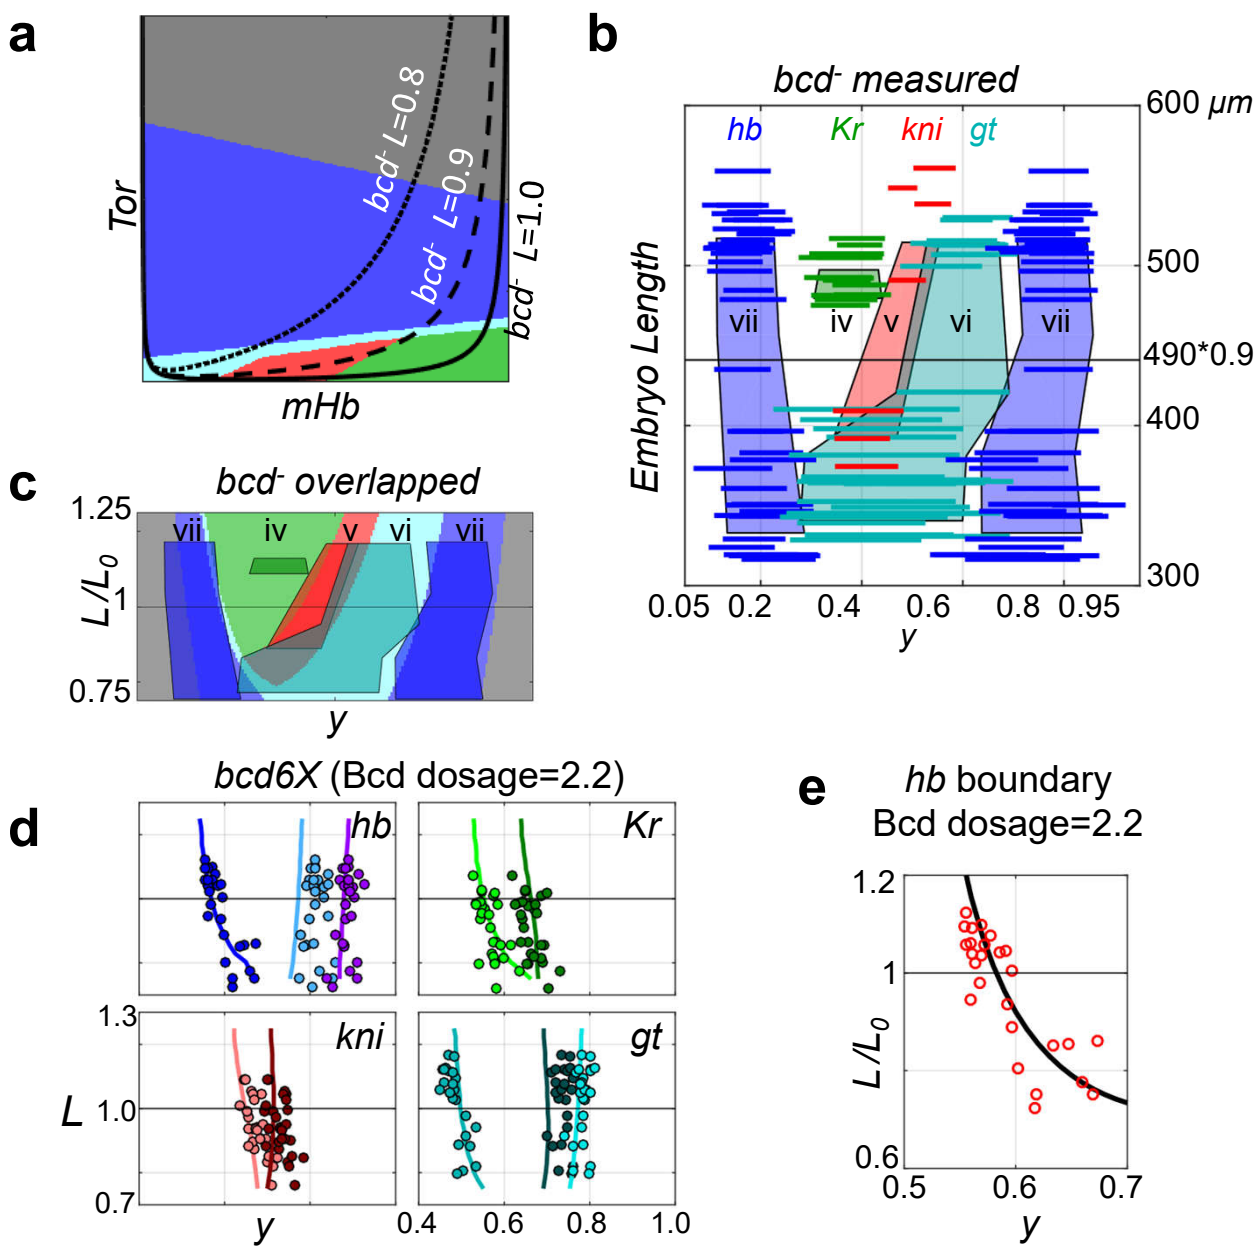

**Fig. S7-continued**

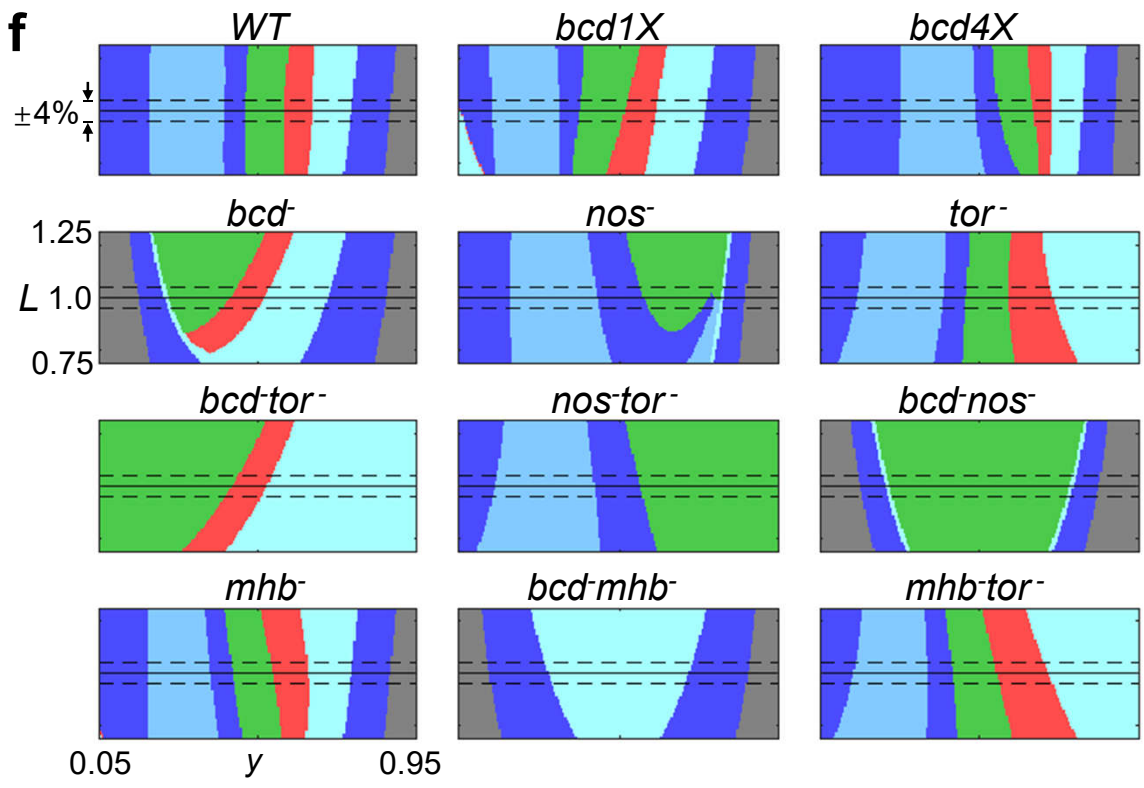



**Fig. S8**

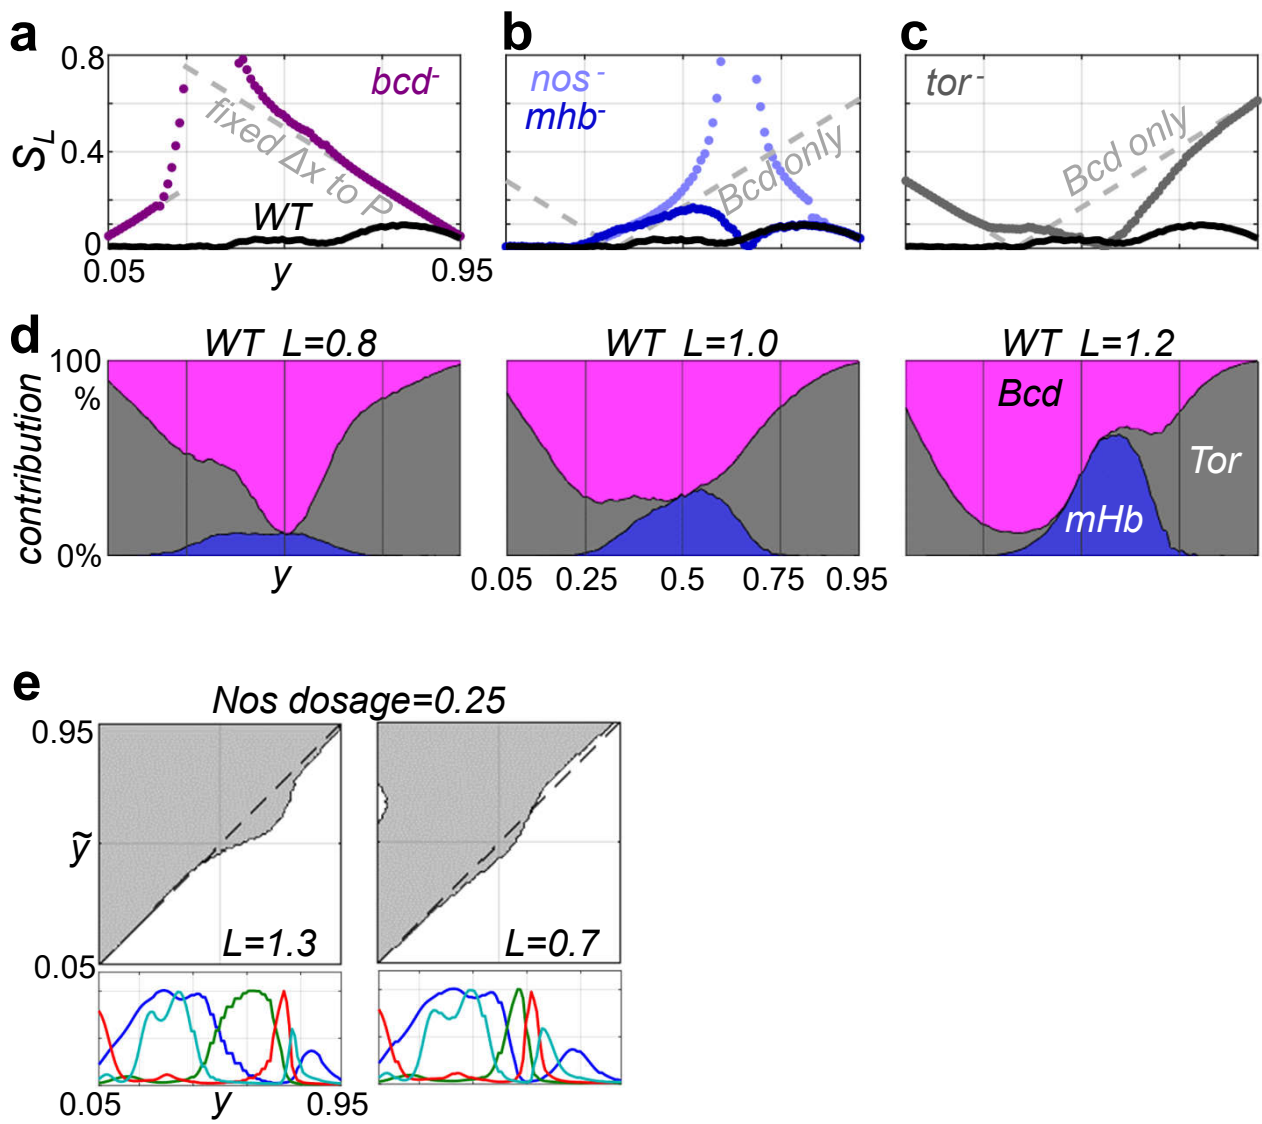



**Fig. S9**

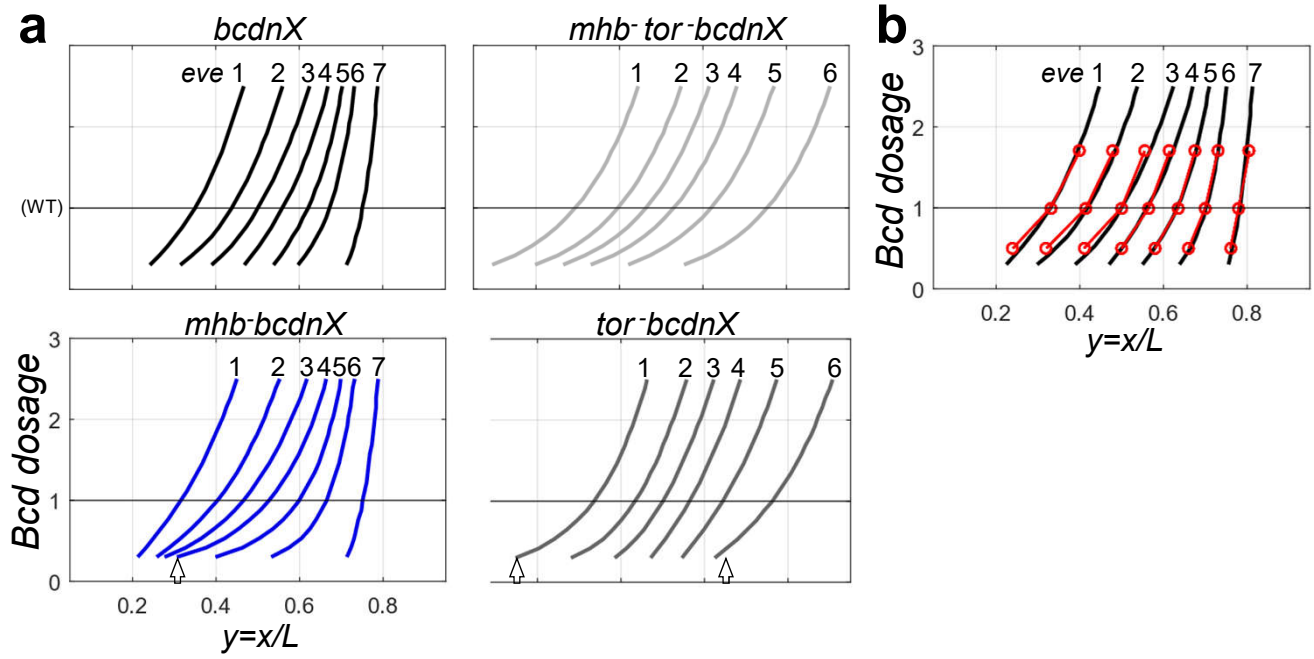

**Fig. S10**

**a** *Noise-only decoder*

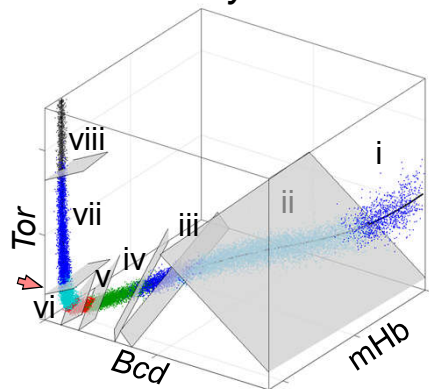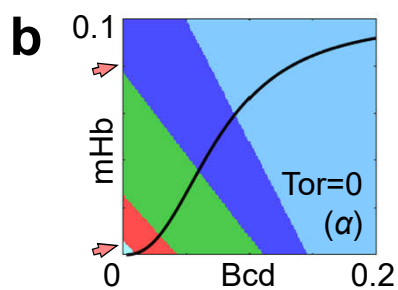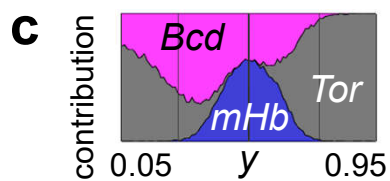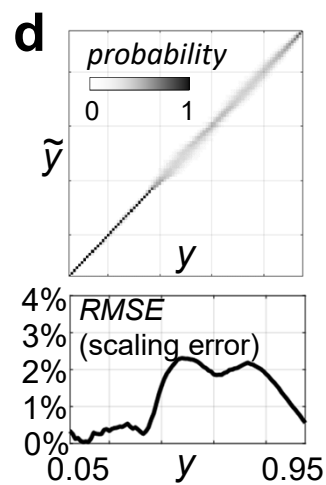

**e** *Null model*

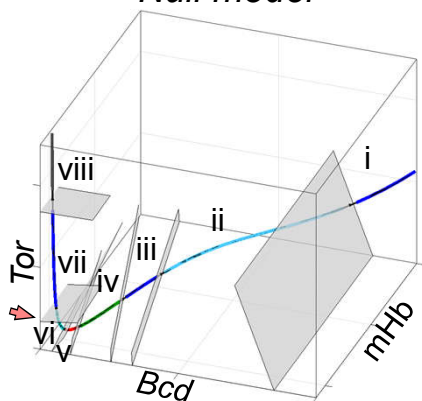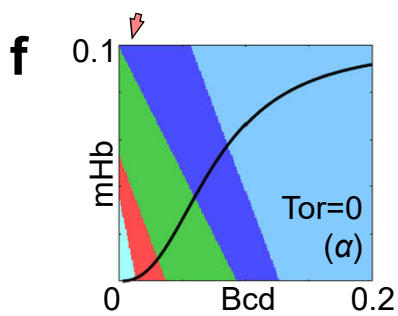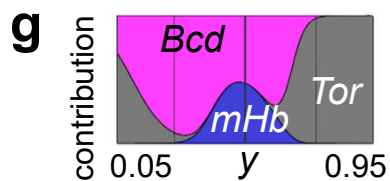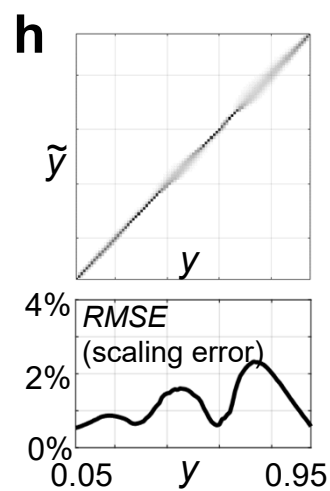

**i** *Scaling decoder*

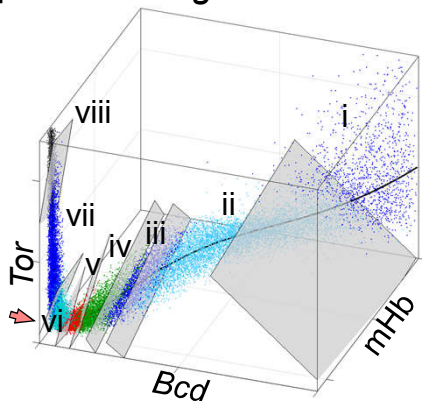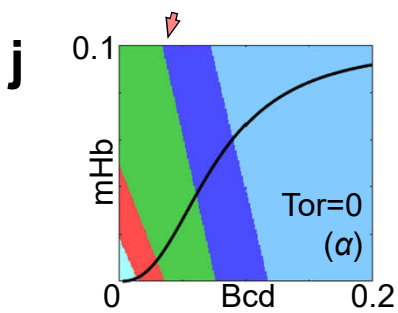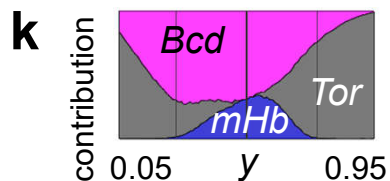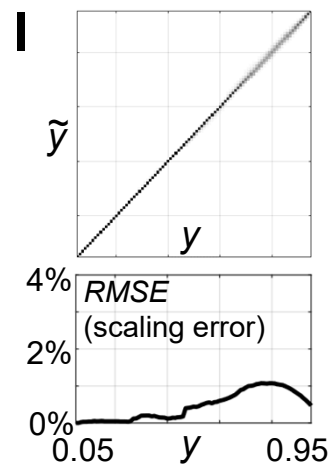

**Fig. S10-continued**

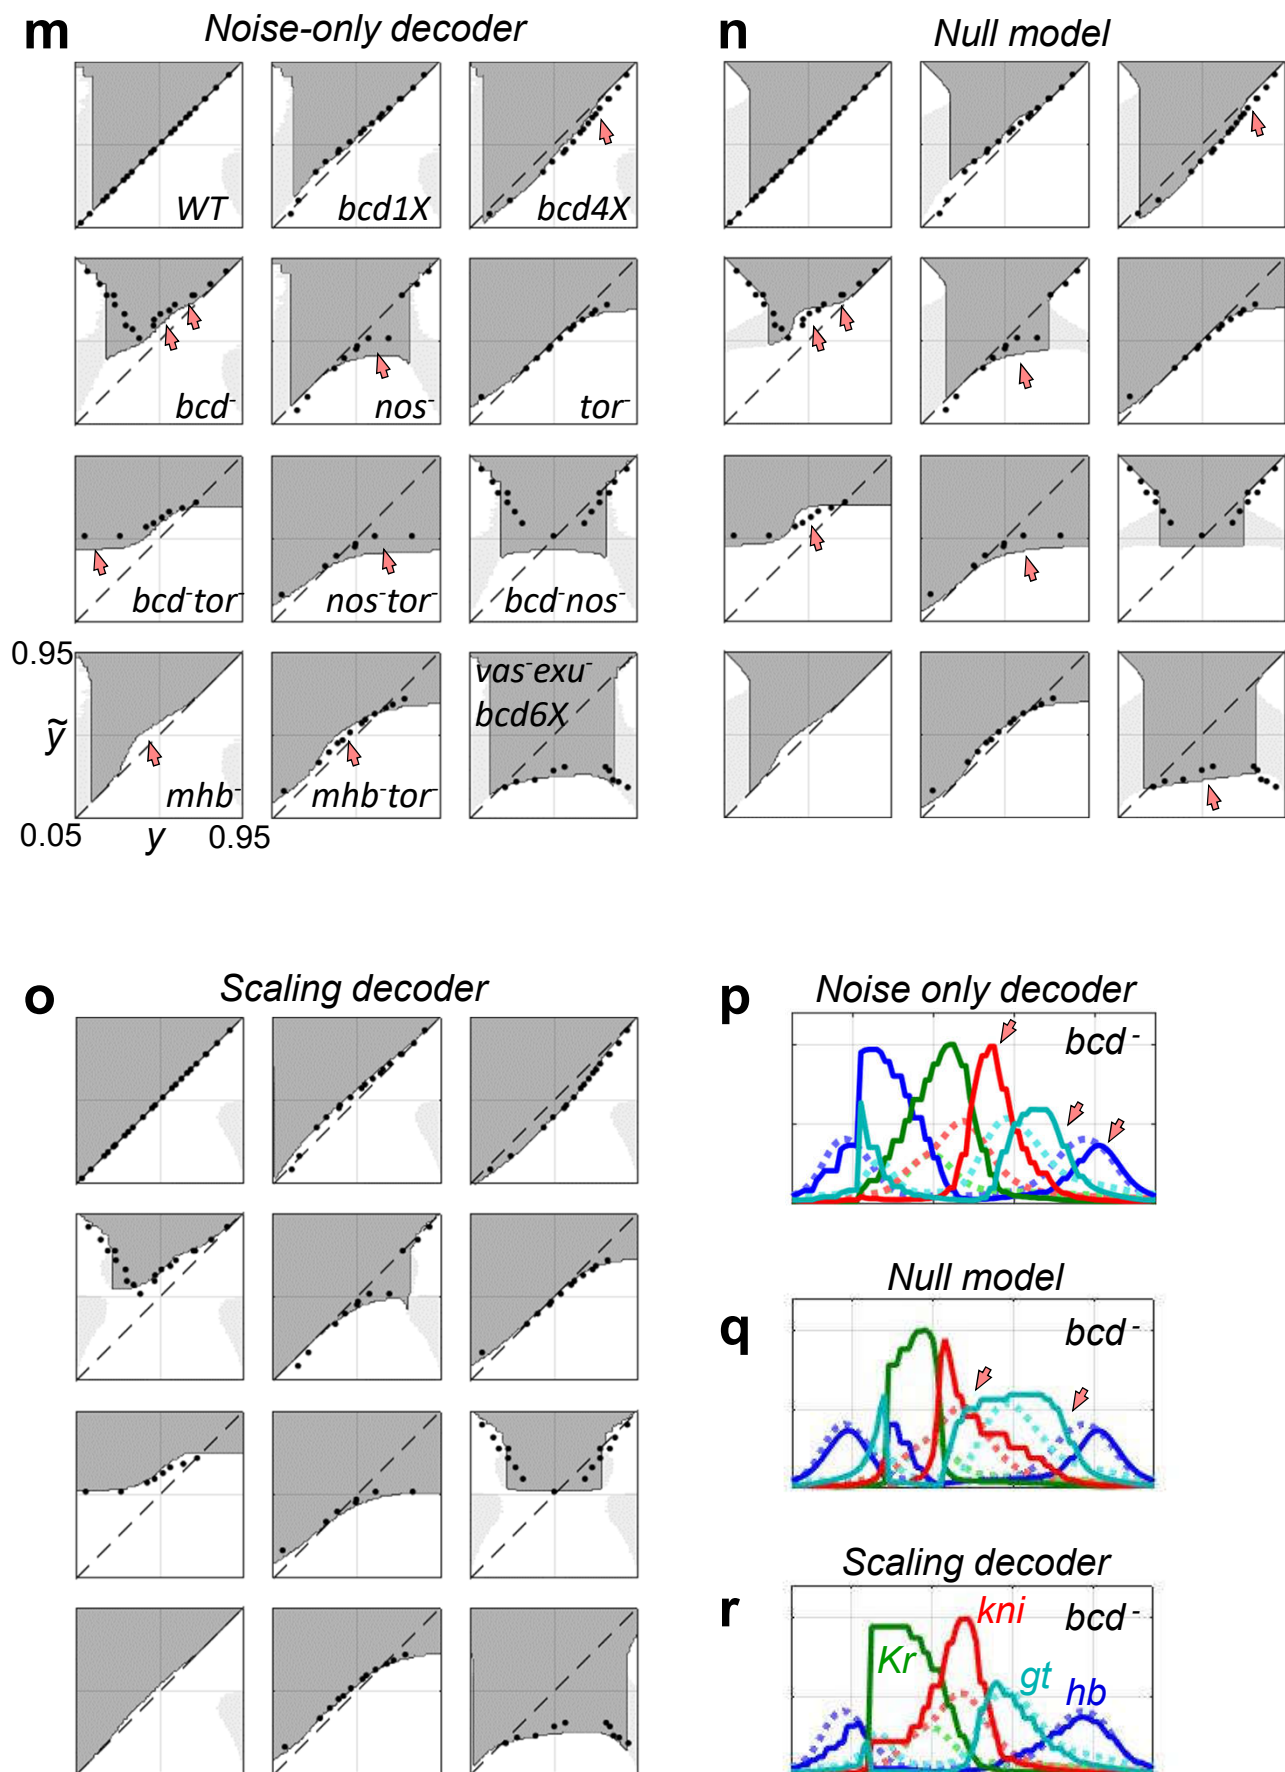

**Fig. S10-continued**

**S** *Noise-only decoder (bcd<sup>+</sup>)*

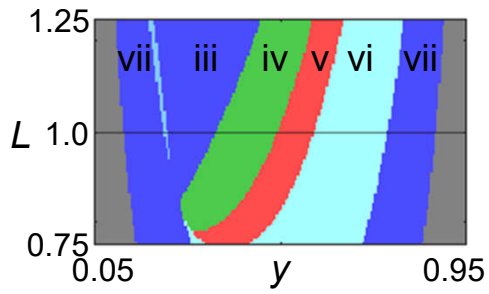

**t** *Null model (bcd<sup>+</sup>)*

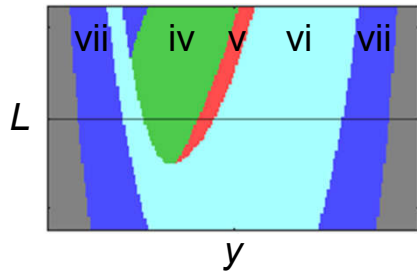

**u** *Noise-only decoder*

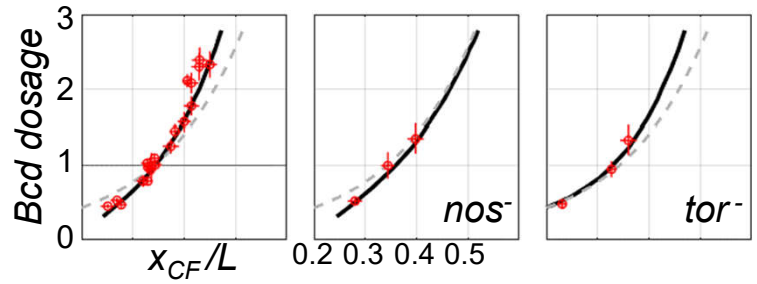

**v** *Null model*

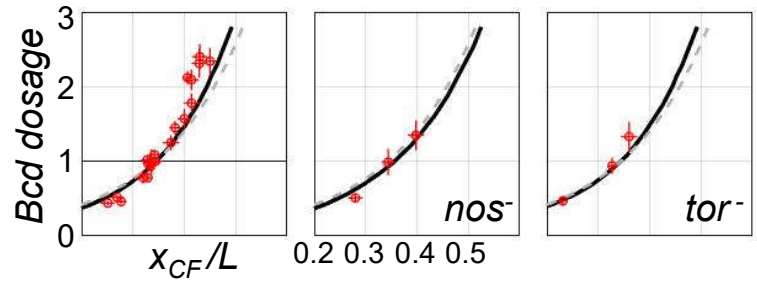

**Fig. S11**

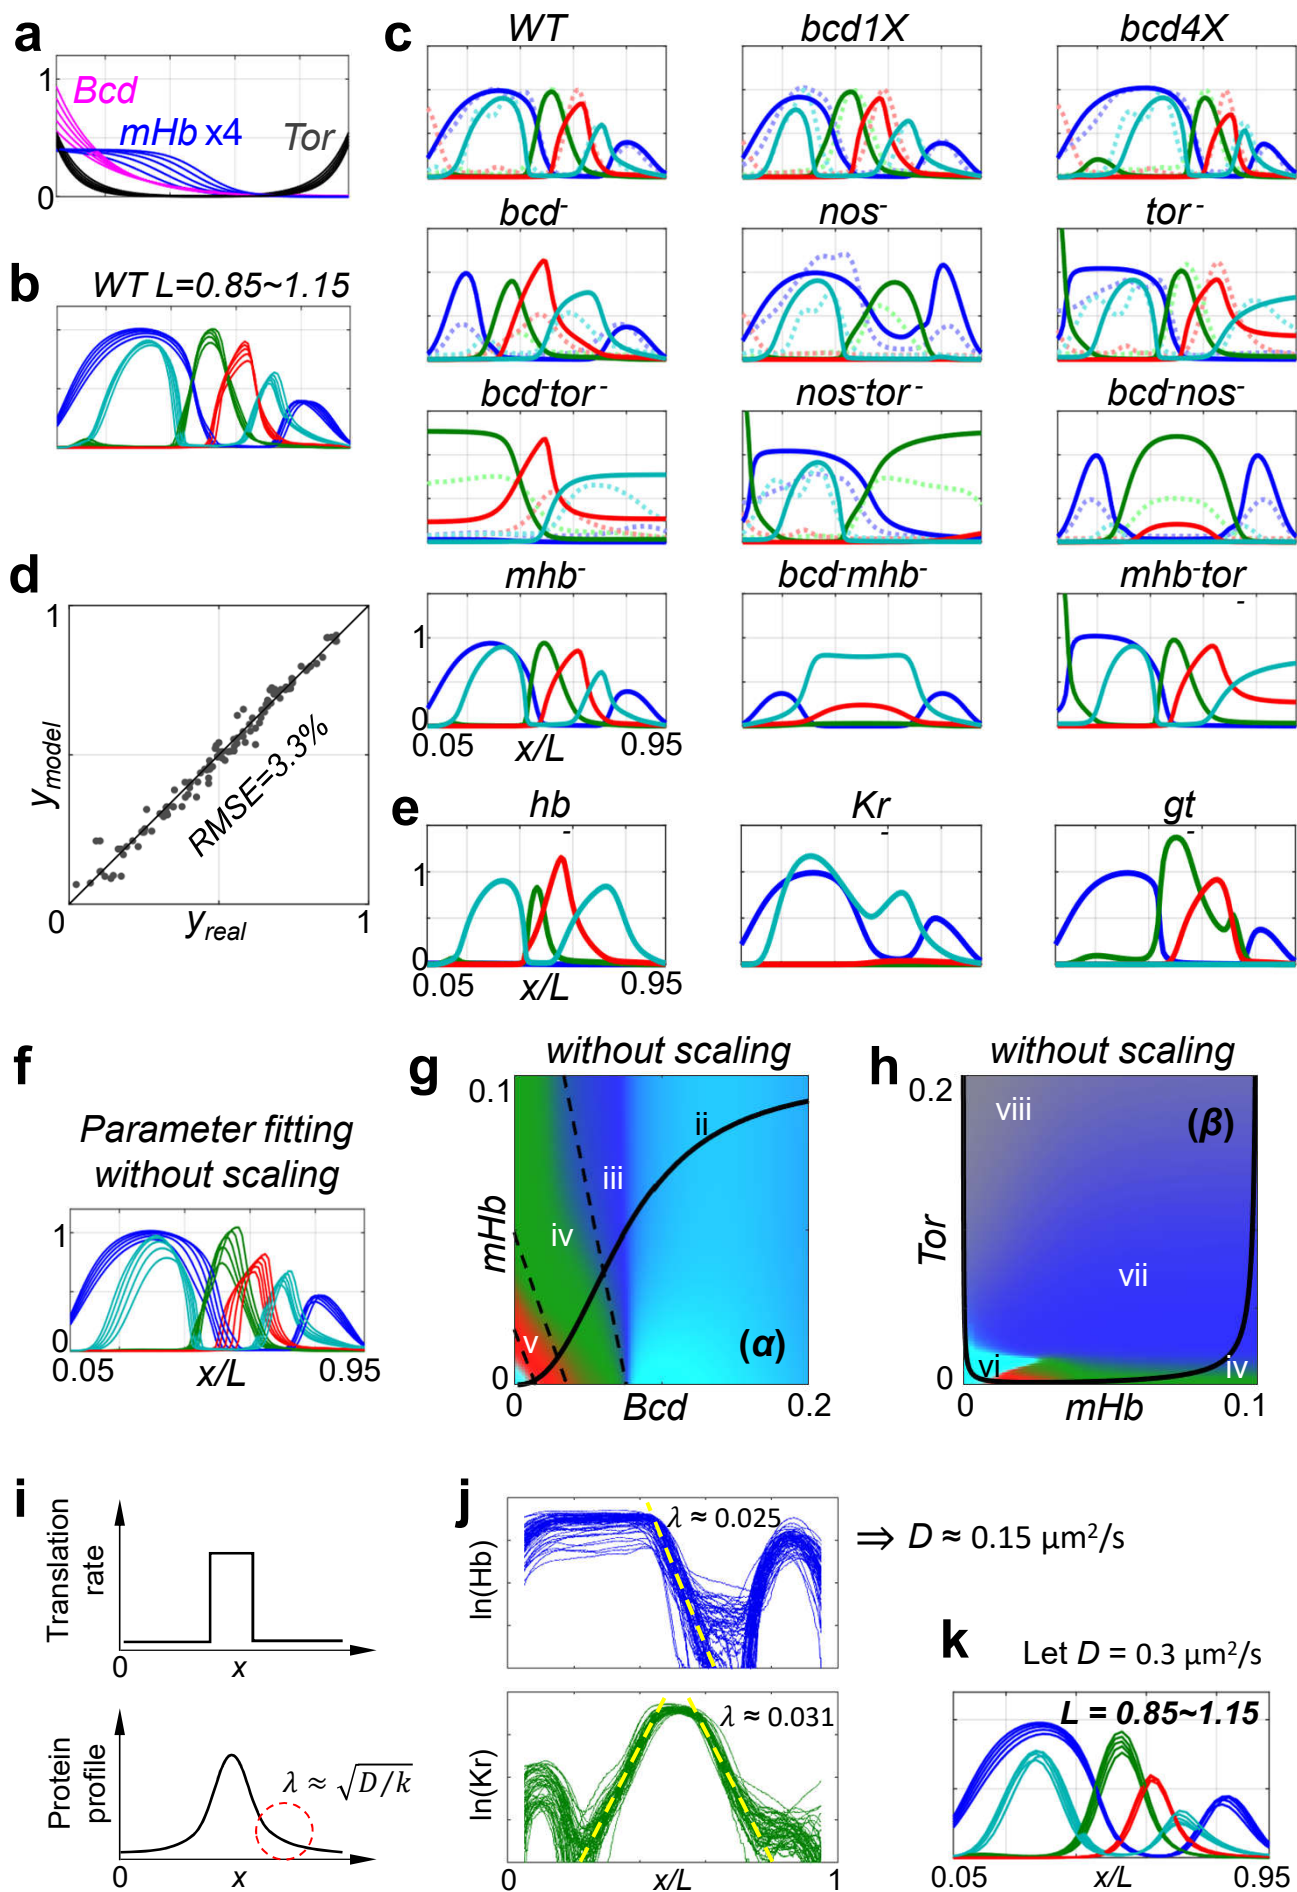



**Fig. S12**

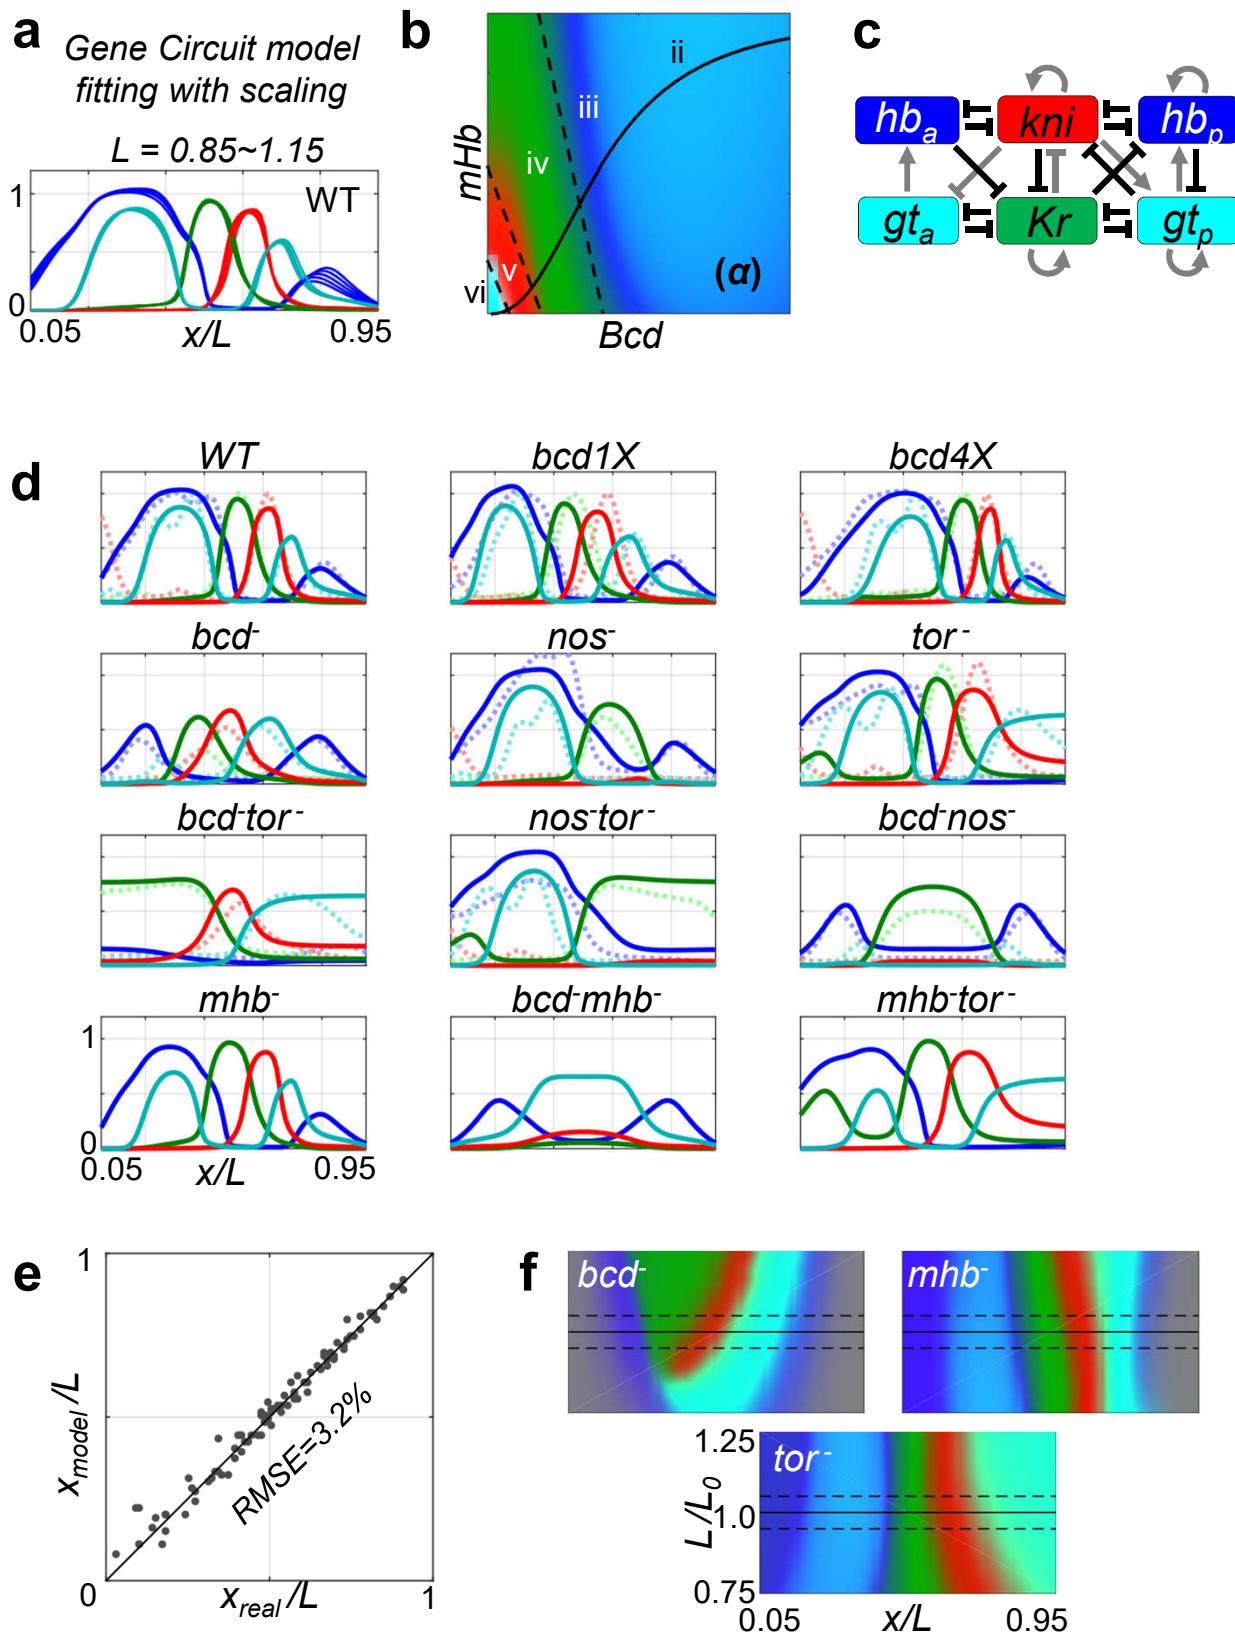

**Fig. S13**

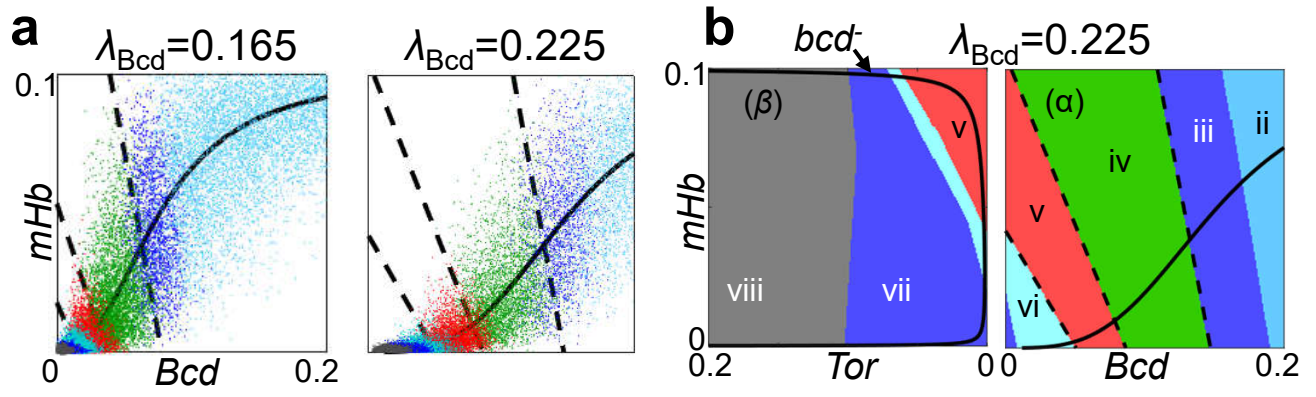

Supplement: Supplementary file [file media-2.pdf]
