# Supplementary material for: Scaling dictates the decoder structure
Source: bioRxiv or medRxiv preprint supplement (doi:10.1101/2021.03.04.433820), 2021-11-21
Supplement: Supplementary file [file media-1.pdf]

1 **Supplementary Information for**

2 **“Scaling dictates the decoder structure”**

3 By Jingxiang Shen, Feng Liu, and Chao Tang\*

4

5 **Content.**

6 **Supplemental text.**

7 **S1.** Shape of the maternal morphogen profiles.

8 **S2.** Modelling length fluctuation and noisy morphogen gradients.

9 **S3.** Fitting the linear classification planes.

10 **S4.** Making predictions with the set of linear classifiers.

11 **S5.** The Bayesian decoder.

12 **S6.** Discussion on some of the predictions in Fig. 3d.

13 **S7.** *bcd* and *bcd6X* embryos with reduced lengths.

14 **S8.** The three maternal gradients in *Drosophila* function as two bi-gradient pairs.

15 **S9.** Shift of the *eve* stripes under Bcd dosage change.

16 **S10.** Optimal decoder for noisy gradients without embryo length variation.

17 **S11.** Implementing the scaling decoder with a dynamical gene regulation model.

18 **S12.** Nos/mHb as the posterior gradient.

19 **S13.** Discussion on the long-germband insect *Megaselia abdita*.

20

21 **Supplemental figures.**

22 **Fig. S1.** The mHb profile can be fitted by a sigmoidal curve.

23 **Fig. S2.** Simulating noise in the Bcd gradient by a Poisson noise term.

24 **Fig. S3.** Predicting mutant fate-map with linear classifiers.

25 **Fig. S4.** Effects of the Bcd  $\beta$  factor and noise amplitude on model performance.

26 **Fig. S5.** The Bayesian decoder.

27 **Fig. S6.** Outputs of the scaling decoder on mHb=0 and mHb=mHb<sub>0</sub> planes.

28 **Fig. S7.** Maternal morphogen mutant embryos with greatly changed length.

29 **Fig. S8.** The three maternal gradients function as two bi-gradient pairs.

30 **Fig. S9.** Shift of the *eve* stripes under Bcd dosage change.

31 **Fig. S10.** Optimal decoder for noisy gradients with or without length variation.

32 **Fig. S11.** The ODE-based gap gene regulation model.

33 **Fig. S12.** The scaling gene circuit model.

34 **Fig. S13.** Generating scaling *Drosophila* gap gene pattern with a more extended Bcd

35 profile.

36

37 **Supplemental tables.**

38 **Table S1.** Peak and boundary positions extracted from maternal morphogen mutants.

39 **Table S2.** Parameters for the scaling ODE model.

40 **Table S3.** Parameters for the scaling gene circuit model.

41

42 **S1. Shape of the maternal morphogen profiles.**

43 **Bicoid (Bcd).** The Bcd concentration gradient is generated by diffusion from a  
44 localized source. At steady state, its profile should be exponential, which is fully  
45 consistent with experiments (therefore, we do not consider the possibility raised in  
46 Ref. <sup>1</sup>):

47 
$$Bcd(x) = e^{-\frac{x}{\lambda_B}}.$$

48 Its absolute length constant  $\lambda_B$  is fully determined by the diffusion constant  $D$  and  
49 decay rate  $\gamma$  ( $\lambda_B = \sqrt{D/\gamma}$ ), independent of embryo length <sup>2-5</sup>. Reformulating the Bcd  
50 profile using the “relative” coordinate  $y$ , which is normalized by embryo length  $y \equiv$   
51  $x/L$ , yields:

52 
$$Bcd(y) = e^{-\frac{yL}{\lambda_B}} = e^{-\frac{y}{\lambda_B/L}}.$$

53 For larger embryos ( $L > l$ ), the length constant appears to be shortened in the  
54 normalized coordinate.

55

56 Throughout this paper, the length unit is chosen to be the length of a “standard size”  
57 embryo  $L_0$  (~490  $\mu\text{m}$ ). Therefore, the position  $x$ , embryo length  $L$ , and  $\lambda_B$ , are  
58 dimensionless (normalized by  $L_0$ ). Measured in this way, the Bcd length constant  
59  $\lambda_B = 0.165$ , according to a very carefully performed quantitative measurement <sup>6</sup>.

60

61 Though the Bcd length constant  $\lambda_B$  cannot scale with embryo length, a positive  
62 correlation between Bcd amplitude (absolute concentration at the anterior pole) and  
63 embryo length  $L$  has been observed experimentally <sup>5,7</sup>. i.e., larger embryos tend to  
64 have higher overall Bcd dosage. To reflect this fact, an amplitude factor  $L^\beta$  is  
65 introduced in the Bcd term. Taken together,

66 
$$Bcd(y, L) = L^\beta e^{-\frac{y}{\lambda_B/L}} \quad (S1.1)$$

67 The exponent  $\beta$  should lie between 2 and 3 according to a not very precise  
68 measurement <sup>8</sup>. Being somewhat conservative about this “amplitude correction” effect,

69 we take  $\beta=2$  throughout the main text. No matter if  $\beta=3$  (Fig. S4d). Our model is not  
 70 quite sensitive to the exact value of  $\beta$ .

71

72 This effect produces a “neutral point”  $y=\beta\lambda_B$  with invariant Bcd concentration and is  
 73 proposed by some authors that it may contribute directly to scaling of the gap genes.

74 As mentioned in the main text, we don’t agree with this explanation in general.

75 However, in our framework, although the optimal scaling decoder can always be

76 well-defined with or without this  $L^\beta$  factor, the exact Bcd profile affects the exact

77 orientations of the optimal decision planes. Therefore, to accurately describe the real

78 situation in *Drosophila* (hence making correct predictions on mutants), this Bcd

79 amplitude effect should not be ignored (Fig. S4b, c).

80

81 **Maternal Hb (mHb).** Like Bcd, the posterior gradient Nos should have an

82 exponential profile. (No amplitude correction effects are reported experimentally, so

83 the  $L^\beta$  factor is not added).

$$84 \quad \text{Nos}(y) = e^{-\frac{1-y}{\lambda_N/L}}$$

85 It is well known that Nos functions solely through repressing the maternal component

86 of the gap-gene protein Hb (mHb) in posterior half of the embryo<sup>9-11</sup>. Therefore, the

87 “immediate” posterior morphogen should be mHb instead of Nos. If we assume that

88 mHb level is dictated by Nos through an inhibitive Hill function,

$$89 \quad \text{mHb}(y) = \frac{\text{mHb}_0}{1 + \left(\frac{\text{Nos}(y)}{K}\right)^n}$$

90 then the mHb gradient takes a sigmoidal shape:

$$91 \quad \text{mHb}(y) = \frac{\text{mHb}_0}{1 + e^{\alpha L(y-1+(1-\lambda_H)/L)}} \quad (\text{S1.2})$$

92 Where  $\alpha = n/\lambda_N$ ,  $\lambda_H = 1 + \lambda_N \ln K$ . Although the raw parameters ( $\lambda_N$ ,  $K$ , and  $n$ ) are

93 unknown, measured mHb profiles (Hb protein profile in n.c.12 embryos, from the

94 *FlyEX* database<sup>12,13</sup>) can be well fitted with this sigmoidal curve (with  $\alpha=15$  and

95  $\lambda_H=0.425$ ). See Fig. S1 for the fitting. Note that in this paper we normalize the value

96 of Hb (no matter maternal or zygotic) according to its maxima at n.c.14, so mHb has  
97 an amplitude coefficient  $mHb_0=0.1$ .

98

99 **Torso (Tor).** The activity of Tor is induced at both terminus of the embryo by its  
100 ligand in the perivitelline space <sup>14,15</sup>. Tor transduces the activation signal into the  
101 syncytial embryo by phosphorylating ERK. Phosphorylated ERK (dpERK) diffuses in  
102 the cytoplasm, trapped by the nucleus, and dephosphorylated (i.e. “degraded”) inside  
103 the nucleus <sup>16</sup>. This is a similar picture of the “localized synthesis, diffusion, and  
104 decay” model of Bcd and Nos. So, it is reasonable to assume that the activity of Tor  
105 has an exponential profile as well.

$$106 \quad Tor(y) = e^{-\frac{y}{\lambda_T/L}} + e^{-\frac{1-y}{\lambda_T/L}} \quad (S1.3)$$

107 Quantitative measurements on dpERK indeed show double-exponential profiles  
108 (when projected onto the one-dimensional anterior posterior axis) <sup>16,17</sup>. In this paper  
109 we use an estimated value  $\lambda_T=0.07$  for its length constant.

110

111 These equations give Eqn. 5a-c in the main text.

112

113 Precise measurements on the scaling property of mHb and Tor is still lacking and very  
114 difficult to perform. Our assumption that they should both be unscaled with embryo  
115 length is the minimal assumption. This minimal assumption is consistent with the  
116 known mechanisms through which the gradients are established, and is also supported  
117 by the case studied in Fig. 5a. See SI-7 for detail.

118

## 119 **S2. Modelling length fluctuation and noisy morphogen gradients**

120 The WT point cloud used for fitting the linear classification planes are defined as  
121 follows. First, the A-P axis is discretized into 101 points  $y=0\%$  to  $100\%$ . For each of  
122 the  $y$  position, we sample 400 embryo length values from the normal distribution  
123  $L \sim N(1, 0.1)$  and calculate the corresponding noise-free (Bcd, mHb, Tor) levels using  
124 Eqn. 5. This three noise-free values are noted by  $\mathbf{m}=(m_1, m_2, m_3)$  for convenience.  
125 Obviously,  $0 < m_{1,3} < 1$  and  $0 < m_2 < 0.1$ . This give the 2-d “WT manifold” in Fig. 2c.

126

127 The fact that embryo length  $L$  only fluctuates within a limited range is important.  
128 Outside certain  $L$  range, the decoder behavior should not be subjected to selection  
129 pressure since embryo size hardly fluctuate that much under natural conditions. Thus,  
130 in the strictest sense, only within the region covered by *realistic* WT embryos, the  
131 effective input-output relation of the decoder should follow that dictated by scaling.

132

133 Secondly, a Poisson noise is added to each morphogen value  $m_i$  by assuming the  
134 actual number of molecules is a Poisson variable  $n_i$  with  $\langle n_i \rangle = N * m_i$ , and the final  
135 (normalized) morphogen level with noise is  $m_i = n_i / N$ . The (hypothetical) maximum  
136 molecule number  $N$  controls the noise magnitude. We set  $N=1000$  throughout the  
137 main text. From a theoretical perspective, the noise terms turn the 2-dinemsional WT  
138 manifold (Fig. 2c) into a 3-dimensional WT point cloud (Fig. 2d).

139

140 Note that  $N=1000$  does not correspond to the number of molecules per nucleus (which  
141 result in the intrinsic noise). Instead,  $N=1000$  is chosen to make the positional error of  
142 modeled Bcd gradient close to that measured by Ref.<sup>18</sup>, which included both intrinsic  
143 and extrinsic noises.

144

145 To be specific, positional noise (standard deviation  $\sigma$  of position  $y$ ) of the Bcd  
146 gradient in standard-sized ( $L=1$ ) embryos can be expressed as

147 
$$\sigma_y \left| \frac{d\bar{N}_{Bcd}}{dy} \right| = \sigma_{N_{Bcd}} \quad (S2.1)$$

148 For Poisson distribution:  $(\sigma_{N_{Bcd}})^2 = \bar{N}_{Bcd} = N e^{-y/\lambda}$ . Thus:

149 
$$\sigma_y = \frac{\lambda}{\sqrt{N}} e^{-\frac{y}{2\lambda}} \quad (S2.2)$$

150 Substituting  $\lambda=0.165$  and  $N=1000$  into this equation, gives the modeled positional  
151 noise as the black curve in Fig. S2, overlapped on the experiment results of (Gregor,  
152 et. al. 2007).

153

154 The measured results on Bcd noise should be reliable in the region  $0.2 < y < 0.6$ , since it  
155 is far enough from Bcd mRNA is distribution, also, Bcd protein level here is high  
156 enough to be safe from experimental detection limit. In this region  $0.2 < y < 0.6$ ,  
157 strengths of Bcd noise introduced by our Poisson term are close to the measured  
158 values. (Our model is not quite sensitive to the exact value of  $N$ , see Fig. S4 E-F for  
159 the results when  $N=500$  or  $2000$ .)

160

161 Note that “Bcd noise” here should stand for the measured embryo-to-embryo  
162 fluctuation in an ensemble of standard-sized ( $L=1$ ) embryos. i.e., it accounts for both  
163 intrinsic noise (finite number of Bcd protein molecules per nucleus), and extrinsic  
164 noise (e.g., embryo-to-embryo variability in overall Bcd amplitude) except for length  
165 variation. Theoretically, intrinsic and extrinsic noises are different, in that extrinsic  
166 noise is correlated for nucleus belonging to the same embryo. However, since our  
167 decoder works in a *spatially decoupled* manner, it cannot distinguish whether two  
168 different (Bcd, mHb, Tor) points come from the same embryo or not. In other words,  
169 only the overall strength of fluctuation matters, no matter the fluctuation comes from  
170 intrinsic molecular noise or embryo-to-embryo variation. The decoder deals with all  
171 nucleus in all embryos of the *Drosophila* species simultaneously. Therefore, intrinsic  
172 and extrinsic noises are not treated separately here.

173 **S3. Fitting the linear classification planes.**

174 The entire point cloud in Fig. 2d consists of 101 subsets  $\mathbf{m}|_y$ , each of them have 400  
175 points. The 100 classification planes locate at  $y=0.5\%$ ,  $1.5\%$ , ...,  $99.5\%$ , numbered as  
176 classifiers #1, ..., #100 (and we only consider #6 to #95 in the main text). Each of the  
177 planes should perform the *local* classification task of distinguishing  $\mathbf{m}$  points belongs  
178 to adjacent  $y$ 's.

179

180 For example, the plane #3 locating at  $y=2.5\%$  should first go through the  $\mathbf{m}$  point  
181 representing the *noise-free* morphogen levels at  $y=2.5\%$  in *standard-sized* WT by  
182 itself. Secondly, the plane orientation is defined by that can best distinguishing the  
183 point classes  $\cup_{y=\{0\%,1\%,2\%}} \mathbf{m}|_y$  against  $\cup_{y=\{3\%,4\%,5\%}} \mathbf{m}|_y$ . To find the best-fit  
184 plane orientation numerically, we simply enumerate the Euler angles  $\theta$  and  $\varphi$  of its  
185 normal vector at the resolution of  $1^\circ$  and find the one with the highest classification  
186 accuracy.

187

188 The noise due to finite sampling and discretizing  $\theta$  and  $\varphi$  are eliminated by averaging  
189 the classification plane orientations for 25 repeats of the above sampling and fitting  
190 steps.

191



192 **S4. Making predictions with the set of linear classifiers.**

193 The portion of (Bcd, mHb, Tor) space where the decoder output is directly dictated by  
194 scaling (that is, the region covered by the WT point cloud) does not include all the  
195 situations in the morphogen mutant embryos. Extrapolations are therefore needed for  
196 making predictions in general. Fortunately, for the *Drosophila* case most mutants of  
197 interest lie not far away from the WT point cloud. Thus extrapolations could make  
198 sense here.

199

200 We think the most simple and natural assumption is to extrapolate linearly with the  
201 classification planes defined above.

202

203 Firstly, we know from Fig. 6c that the decision boundaries realized by gene  
204 interaction network can only follow the scaling requirements to the linear order in  
205 general, thus starting only from scaling we simply have no information about possible  
206 higher-order features.

207

208 Secondly, the unstable manifold of a bi-stable diagram tends not to have large  
209 curvature except in the neighborhood of a critical point (Fig. 6b). Although the real  
210 gap gene network is not a simple bi-stable system, we think this intuition should still  
211 hold.

212

213 Finally, in Fig. 6d-f we presented a differential-equation-based gene regulation model  
214 using the known gap gene interaction network. This kind of model indeed extrapolate  
215 in a very much linear way.

216

217 We next describe how the linear extrapolations are carried out precisely. Obviously,  
218 100 well-separated planes should divide the morphogen space (the cube with  $0 < m_1 < 1$ ,  
219  $0 < m_2 < 0.1$ ,  $0 < m_3 < 1$ ) into 101 slices, corresponding to  $\tilde{y}=0\%$  to 100%. If a query  $\mathbf{m}$

220 point falls into the slice  $\tilde{y}=n\%$ , it locates on the posterior side of classification planes  
221 #1 through #n, and on the anterior side of planes #n+1 to #100. Therefore, the  
222 corresponding cell fate  $\tilde{y}$  can be read out from the classification results of all the  
223 linear classification planes. Consider the  $y=0.4$  point in an  $L=1$  *bcd* *tor* embryo,  
224 whose  $m=(0,0.059,0)$  (according to Eqn. 5, shown as black cross in Fig. S3a). This  
225 point lies in the  $\tilde{y}=0.56$  slice, i.e., between the classification planes #55 and #56.

226

227 In some other situations, however, the 100 linear classifiers could have contradictory  
228 outputs. Say, the point (0.004, 0, 0.24) are classified to the posterior side by classifier  
229 #70 but to the anterior side by #30. We introduce a “posterior dominance rule” to  
230 tackle this difficulty. Anytime when this happens, output of the anterior classifier (#30  
231 here) is always ignored. The reason for us to introduce the posterior dominance rule is  
232 simple – some anterior classification planes may intersect with the much more  
233 posterior region of the point cloud, vary far from where they were fitted (Fig. S3b).  
234 This posterior dominance rule works well, yielding the results in Figs. 2-5.

235

236 To be more precise how the fate map curves in Fig. 3 are obtained, we explain here  
237 that which “fate slice” a query point should fall is determined by analyzing the  
238 classification outputs by all the 100 classification planes. In the ideal case,  $\tilde{y}=n\%$   
239 means that classifiers #1 through #n output “posterior”, and classifiers #n+1 to #100  
240 output “anterior”. Graphically, the decoder outputs are recorded by a column of pixels,  
241 with grey stands for “anterior” and white stands for “posterior”, and the fate map in  
242 Fig. 3 is then given by extracting the grey-white boundary of Fig. S3c.

243

244 Also note that those classifier outputs ignored by the posterior dominance rule are  
245 shown in lighter color in Fig. S3c. Graphically, this rule is equivalent to wiping out all  
246 the grey pixels once there exists a white pixel above them. The “posterior dominance  
247 rule” is a quite rough rule after all. Sometimes it leads to artifacts near the embryo

248 terminus. For example, the fate map of *bcd1X* (and *vas<sup>-exu</sup>bcd6X*) in Fig. 3 shows  
249 abrupt jumps near the anterior (and posterior) end. However, this kind of error do not  
250 affect prediction in most cases.

251 **S5. The Bayesian decoder.**

252 With our settings, given position  $y$  and embryo length  $L$ , the morphogen levels  $\mathbf{M}$   
 253 satisfy the Poisson distribution:

$$254 \quad p(M_i|y, L) = \frac{(Nm_i(y, L))^{M_i}}{M_i!} e^{-Nm_i(y, L)} \quad (i = 1, 2, 3),$$

255 where  $m$  is the *noise-free* morphogen profile defined in Eqn. 5 in main text, and  $N$  is  
 256 the “effective maximal molecule number” as described above. Also, noise on different  
 257 morphogens are assumed to be independent:

$$258 \quad p(\mathbf{M}|y) = \int dL \rho(L) \prod_{i=1}^3 p(M_i|y, L),$$

259 where the embryo length follows the Gaussian distribution  $L \sim N(\mu=1, \sigma=0.1)$

$$260 \quad \rho(L) = \frac{1}{\sqrt{2\pi}\sigma} e^{-\frac{(L-1)^2}{2\sigma^2}}$$

261 Inferring  $y$  from the morphogen levels  $\mathbf{M}$  can be performed using the Bayes formula

$$262 \quad p(y|\mathbf{M}) = \frac{p(\mathbf{M}|y) p(y)}{p(\mathbf{M})}$$

263 Since  $y$  is uniformly sampled from 0 to 1, the Bayesian decoder becomes a maximal  
 264 likelihood decoder.

$$265 \quad \operatorname{argmax}_y p(y|\mathbf{M}) = \operatorname{argmax}_y p(\mathbf{M}|y)$$

266 Decoding results for the WT point cloud of Fig. 2d by the Bayesian decoder is shown  
 267 in Fig. S5a. Although arbitrary decision boundary geometry is allowed by the  
 268 Bayesian decoder, its Root Mean Squared Error (RMSE) is even larger than the linear  
 269 decoder presented in the main text (Fig. S5b). This is conceivable, as maximization of  
 270 posterior likelihood could lead to minimal regression error only when the decoding  
 271 error is Gaussian, which not satisfied here. Therefore, we claimed in the main text that  
 272 the remaining classification errors of the linear decoder should due to the morphogen  
 273 noise rather than nonlinearity in classifier geometry. This can be visualized by  
 274 choosing a tangential view of the classification planes in Fig. 2D-E (Fig. S5d).

275

276 In comparison with the Bayesian decoder, there are some additional arguments on our  
277 linear extrapolation hypothesis. As expected, decision boundaries of the Bayesian  
278 decoder are effectively linear within the WT point cloud (Fig. S5c, on the alpha plane).  
279 However, situations outside the WT point cloud are quite different: There, outputs of  
280 the Bayesian decoder are determined by extremely improbable cases, say very large  $L$   
281 variation or very large fluctuation in morphogen level, which are basically irrelevant  
282 to realistic embryos. While the linear classifier emphasizes more on simplicity of the  
283 decision boundary geometry, and turned out to be a better way of extrapolation.  
284

285 **S6. Discussion on some of the predictions in Fig. 3d.**

286 (*mhb*<sup>-</sup>). Among the mutant cases in Fig.3d, we do not have quantitative data for *mhb*<sup>-</sup>,  
287 but we are quite confident that this prediction is correct. It has long been known that  
288 although *nos*<sup>-</sup> embryos (where mHb is uniformly high) lack all abdominal segments, it  
289 can be largely rescued by further eliminating mHb completely. The *nos*<sup>-</sup>*mhb*<sup>-</sup> double  
290 mutation embryo is viable and has basically normal morphology<sup>9,10</sup>. This observation  
291 led people to discover that for WT the only function of Nos is to inhibit mHb, but it  
292 also shows that even if the morphogen mHb does not exist at all, the embryo should  
293 not miss any segment. Our prediction in *mhb*<sup>-</sup> matches this observation. The predicted  
294 fate map is almost along the diagonal albeit slight distortions. Fig. S6 provides a  
295 graphical visualization on the case of *nos*<sup>-</sup> and *mhb*<sup>-</sup>.

296

297 (*vas*<sup>-</sup>*exu**bcd6X*). The *vas*<sup>-</sup>*exu**bcd6X* embryo lacks *nos* and has flattened and overall  
298 increased Bcd gradient<sup>19</sup>, and the measured *bcd* profile is used for this prediction.  
299 This mutant display mirrored head structures near the posterior pole. The yellow  
300 squares marked in Fig. 3d *vas*<sup>-</sup>*exu**bcd6X* panel represent the expression peaks and  
301 boundaries of the head gap genes *otd*, *btd*, and *ems*, measured by Ref.<sup>19</sup>.

302

303 (*bcd1X* and *bcd4X*). *bcd1X* or *bcd4X* here means the situations where Bcd dosage is  
304 halved or doubled exactly, not the actual *bcd* copy number. Hb boundary in *bcd1X* or  
305 *bcd4X* is predicted to shift by -7.3% or +9.1% by our scaling decoder, and the  
306 experimentally measured shifts are -6.4% and +9.4% according to Ref.<sup>6</sup>.

307

308

309

310 **S7. *bcd* and *bcd6X* embryos with reduced lengths.**

311 The case of *bcd* has been discussed in the main text. Our model predicts that domains  
312 iv and v should disappear successively (main text Fig. 5a), this is visualized  
313 graphically in Fig. S6a as the *bcd* curve loses contact with the green and red regions  
314 successively as *L* shrinks.

315

316 This prediction is consistent with the experiments of Ref. <sup>7</sup>, where *bcd* embryos with  
317 greatly reduced embryo lengths are obtained by *fat2RNAi*. We replot the experiment  
318 data (Fig. 6B of Ref. <sup>7</sup>) here for a quantitative comparison (Fig. S7b, the narrow  
319 anterior *gt* domain is ignored). In this figure, each horizontal bar represents a  
320 measured gap gene expression domain in a *bcd* or *bcd fat2RNAi* embryo. Its position  
321 in the vertical direction represents its embryo length. With decreasing length, the *kni*  
322 and *gt* domains shift anteriorly in the normalized coordinate *y*. Also, *Kr* and *kni*  
323 domains disappear successively, leaving a widened *gt* domain in the middle.

324

325 To allow quantitative comparisons, it is worth noting that the length of the fixed  
326 embryos used in the immunostaining experiments is in general shrunked. We still have  
327 some difficulties in figuring out all the complexities and experimental details  
328 regarding the shrinking ratio (i.e., the ratio of the embryo length after fixation and  
329 immunostaining to that of the same embryo when still alive). Therefore, the shrinking  
330 ratio is *assumed* to be 90% here, which makes the experiments and our model  
331 prediction overlap satisfactorily (Fig. S7c).

332

333 This result directly supports our basic assumption on the maternal morphogens, that  
334 mHb and Tor gradients should be unscaled with *L*. In this picture, both posterior Tor  
335 and mHb gradients measure the absolute distance from the posterior pole, and the gap  
336 gene domains v-viii should simply follow these fixed distances and move anteriorly in  
337 relative coordinate as *L* shrinks. Similarly, the anterior bands (reversed domains vii

338 and viii) are kept at fixed distances from the anterior pole by reading the anterior Tor  
339 gradient. In between is the *Kr* domain, which shrinks with *L*.

340

341 Using the *fat2RNAi* technique, Ref. <sup>7</sup> also studied the gap gene patterns in *bcd6X*  
342 embryos under length change. Note that with 6 copies of *bcd*, the resulting Bcd  
343 protein dosage was actually only be approximately doubled <sup>20</sup>, rather than multiplied  
344 by 3. This knowledge is consistent with the position of cephalic furrow reported in <sup>7</sup>,  
345 that CF locates at  $y=0.42$  in the *bcd6X* embryos, very close to those Bcd dosage  $\approx 2.2$   
346 embryos reported by Ref. <sup>6</sup>. So, Bcd dosage is set to 2.2 in our model to simulate  
347 these *bcd6X* embryos. Scaling is not preserved in these embryos – that the gap gene  
348 domain boundaries shift significantly when *L* changes (Fig. S7d). This is the expected  
349 result, as according to our basic assumption, scaling stems from cancelation of the  
350 first-order effects of morphogen level difference due to a change of *L*. Those  
351 first-order derivatives are different for the altered zeroth-order profiles, thereby failed  
352 to cancel each other out.

353

354 In Fig. S7d, the measured boundary positions by <sup>7</sup> are shown as dots, while our  
355 predictions are the solid lines (no “shrinking ratio” is assumed here). Errors between  
356 predictions and the experiments are generally acceptable, except for some of the  
357 boundaries – namely, both boundaries of the *kni* domain, and the anterior boundaries  
358 of the posterior *gt* and *hb* domains. Note that these errors could be corrected by more  
359 careful data processing. And the observation that the *kni* and posterior *gt* domains  
360 may disappear in short enough embryos <sup>7</sup> does not seem to be captured by our  
361 extrapolation based predictions.

362

363 Especially, shift of the mid-embryo *hb* domain can be studied analytically, because  
364 the effect of Tor is nearly negligible in the central region. Profiles of Bcd and mHb  
365 when Bcd dosage is 2.2 are as follows.



366 
$$\begin{cases} \text{Bcd}(y', L') = 2.2 L'^{\beta} e^{-y' L' / \lambda_B} \\ \text{mHb}(y', L') = \text{mHb}_0 (1 + e^{\alpha L' (y' - 1 + (1 - \lambda_H) / L')})^{-1} \end{cases} \quad (S7.1)$$

367 Assume that there exists a WT embryo of length  $L$  with perfectly scaling gap gene  
 368 pattern, in which the  $y=0.473$  position ( $hb$  boundary) has identical Bcd and mHb  
 369 values as the above equation. i.e.,

370 
$$\begin{cases} L^{\beta} e^{-yL / \lambda_B} = 2.2 L'^{\beta} e^{-y' L' / \lambda_B} \\ \text{mHb}_0 (1 + e^{\alpha L (y - 1 + (1 - \lambda_H) / L)})^{-1} = \text{mHb}_0 (1 + e^{\alpha L' (y' - 1 + (1 - \lambda_H) / L')})^{-1} \end{cases}$$

371 Relationship between  $y'$  and  $L'$  can be easily solved by eliminating the unknown  $L$ :

372 
$$L' = \lambda_B \frac{\ln 2.2 - \beta \ln \frac{1 - y'}{1 - y}}{1 - \frac{1 - y'}{1 - y}} \quad (S7.2)$$

373 This analytical result is compared with experiments in Fig. S7e. Note that this  
 374 prediction not even depends on the precise profile of mHb.

375

376 Similar to Fig. 5a-d, we present predicted gap gene domain positions of many other  
 377 maternal morphogen mutants with greatly changed embryo lengths in Fig. S7f. Some  
 378 of them may be tested by experiments in the future.

379

380 **S8. The three maternal gradients in *Drosophila* function as two bi-gradient pairs.**

381 The “tri-gradient system” of Bcd, mHb, and Tor can largely be decomposed into two  
382 parallel bi-gradient systems: Bcd&mHb in the middle part, and Bcd&Tor near both  
383 termini.

384

385 The contribution of each morphogen to scaling can be characterized as follows. From  
386 the results shown in Fig. 5a, c, d, we can calculate the derivative of the position  $y$   
387 where a certain cell fate  $\tilde{y}$  appears with respect to embryo length  $L$  (evaluated at  
388  $L=1.0$ ), defined as the size sensitivity  $S_L$ .

389 
$$S_L \equiv \lim_{\Delta L \rightarrow 0} \left| \frac{\Delta y}{\Delta L} \right| \quad (S8.1)$$

390 With the fitted decoder classification planes,  $S_L$  can be computed as follows. Let  
391  $(Bcd(y), mHb(y), Tor(y))$  be the morphogen levels at  $y$  in an embryo (WT or maternal  
392 morphogen mutant), the corresponding cell fate is  $\tilde{y}(y)$ . Since we would like to track  
393 the position where  $\tilde{y}$  is fixed, the total shift in the (Bcd, mHb, Tor) space caused by  
394  $\Delta L$  and  $\Delta y$  should be perpendicular to the normal vector  $\mathbf{K}$  of the local decision plane:

395 
$$\left( \Delta L \left( \frac{\partial Bcd}{\partial L}, \frac{\partial mHb}{\partial L}, \frac{\partial Tor}{\partial L} \right) + \Delta y \left( \frac{\partial Bcd}{\partial y}, \frac{\partial mHb}{\partial y}, \frac{\partial Tor}{\partial y} \right) \right) \cdot \mathbf{K}(\tilde{y}) = 0 \quad (S8.2)$$

396  $S_L = \Delta y / \Delta L$  can thus be obtained.

397

398  $S_L$  values for WT are always below 0.1 (black curve in Fig. S8a-c); so, even standard  
399 deviation of  $L$  is 10%, positional error introduced by imperfect scaling should be less  
400 than 1% (consistent with Fig. 2f). In *bcd*<sup>-</sup>, patterns follow the fixed absolute distances  
401 to both termini (Fig. S8a, the dashed grey lines). When the Tor gradient is absent (Fig.  
402 S8c),  $S_L$  increases significantly near both termini compared with WT, following that  
403 dictated by Bcd alone (dashed grey line); while in the middle part ( $x/L$  between 0.4 to  
404 0.6)  $S_L$  is still close to zero due to the remaining mHb gradient. The situation is  
405 similar when the mHb gradient is lost (*mhb*<sup>-</sup> or *nos*<sup>-</sup>, Fig. S8b).

406

407 Taken together, these model predictions point to an intuitive interpretation to our  
 408 phenomenological decoder. First, Bcd plays a central role throughout the entire  
 409 embryo. Second, the gradient of mHb works together with Bcd as a pair of  
 410 “bi-gradient” morphogens in the middle part ( $y = 0.25$  to  $0.75$ ), while Bcd and Tor  
 411 works together near both ends ( $0$  to  $0.35$ , and  $0.65$  to  $1.0$ ).

412

413 This feature can also be illustrated from another perspective. We can directly  
 414 calculate the contribution of each morphogen in discriminating adjacent points  $y -$   
 415  $\delta y/2$  and  $y + \delta y/2$  in the WT embryo (for WT  $y \equiv \tilde{y}$ ), i.e. specifying the cell fates  
 416 in WT. The linear classifier sitting at position  $y$  works by computing the sign of the  
 417 inner product:

$$418 \quad Z(y') \equiv (Bcd(y') - Bcd(y), mHb(y') - mHb(y), Tor(y') - Tor(y)) \cdot \mathbf{K}(y)$$

419 Z values for adjacent  $y'$  points should differ by

$$420 \quad Z(y + \delta y/2) - Z(y - \delta y/2) = \left( \frac{\partial Bcd}{\partial y}, \frac{\partial mHb}{\partial y}, \frac{\partial Tor}{\partial y} \right) \cdot \mathbf{K}(y) \delta y.$$

421 The contribution of Bcd, for example, is simply defined as the contribution of the Bcd  
 422 term in this inner product:

$$423 \quad c_{Bcd} = \frac{\frac{\partial Bcd}{\partial y} \cdot K_1(y)}{\left( \frac{\partial Bcd}{\partial y}, \frac{\partial mHb}{\partial y}, \frac{\partial Tor}{\partial y} \right) \cdot \mathbf{K}(y)} \quad (\text{S8.3})$$

424 Values of  $c_{Bcd}$ ,  $c_{mHb}$  and  $c_{Tor}$  along the A-P axis are shown in Fig. 5e. Obviously, these  
 425 three  $c$  terms should add up to 1. The regions in which mHb and Tor play a role is  
 426 clearly shown.

427

428 Note that we can define the Bcd dosage sensitivity  $S_{Bcd}$  in a similar manner.  $S_{Bcd}$   
 429 describes the shift  $\Delta y$  of certain cell fate  $\tilde{y}$  upon an infinite small change of Bcd  
 430 dosage (by a factor of  $1+\varepsilon$ , thus the Bcd exponential profile is effectively shifted by  
 431  $\lambda_B \varepsilon$ ).  $S_{Bcd} \equiv \Delta y / \lambda_B \varepsilon$ .  $\Delta y$  here is determined by

432 
$$\left( \varepsilon(Bcd, 0, 0) + \Delta y \left( \frac{\partial Bcd}{\partial y}, \frac{\partial mHb}{\partial y}, \frac{\partial Tor}{\partial y} \right) \right) \cdot \mathbf{K}(\tilde{y}) = 0.$$

433 Since Bcd has an exponential profile, working out the formula yields that  $S_{Bcd}$  is in  
434 fact the same quantity as  $c_{Bcd}$  defined above.

435

436 An interesting point is that morphogen contributions are different for WT embryos of  
437 different lengths – larger embryos seem to rely more on mHb (Fig. S8d). This may be  
438 a testable prediction for future experiments – the same perturbation in mHb (or Nos)  
439 should introduce larger pattern shift (or more severe segment defects) for larger  
440 embryos (Fig. S8e).

441

442 Also note that Bcd functions throughout the entire embryo is also feasible  
443 biochemically. There should be still around 100 Bcd molecules per nucleus  
444 (concentration on the order of nM) even at the most posterior nucleus (estimated by  
445 the measurements of <sup>18</sup>, with GPF maturation effect corrected following Ref.<sup>6</sup>).

446

447 **S9. Shift of the *even-skipped* (*eve*) stripes under Bcd dosage change.**

448 Shift of the cephalic furrow (CF, corresponds to the fate  $\tilde{y}=0.344$ ) in response to Bcd  
449 dosage change (but embryo length is fixed to  $L=1.0$ ) is discussed in the main text.  
450 This prediction can obviously be generalized to other “marks” on the fate map. For  
451 example, the seven *eve* stripes at  $\tilde{y}=(0.353, 0.435, 0.505, 0.56, 0.62, 0.675, 0.75)$   
452 according to the measurements of <sup>21</sup>. Fig. S9a presents the predictions of the *eve* stripe  
453 positions under Bcd dosage change with or without the presence of the other maternal  
454 gradients (mHb and/or Tor). The intuitive explanation raised in Section S8 is again  
455 reflected in these results – that Bcd dosage robustness in the middle/terminal part  
456 depends on mHb/Tor (arrow heads). Note that since the 5<sup>th</sup> strip of *eve* locates at the  
457 posterior “boulder” between the region mainly governed by Bcd-mHb and that by  
458 Bcd-Tor, it should have exactly the same behaviors as CF discussed in Fig. 5f-h  
459 (which locates at the anterior “boulder” of this kind). This may be tested by future  
460 experimental studies.

461

462 Our predictions on *bcdnX* without further mutating mHb or Tor can be compared to  
463 the measurements of <sup>22</sup>. Their measurements on the *eve* stripes were carried out at  
464 some different developmental timepoint (and the embryo orientations are not  
465 well-controlled). So, we use *their* measured WT positions  $\tilde{y}=(0.33, 0.415, 0.5, 0.565,$   
466  $0.635, 0.7, 0.78)$  to predict their results on *BcdnX* (Fig. S9b). The Bcd dosage of their  
467 *bcd4X* embryos is assumed to be 1.7 times of the WT since no exact values were  
468 provided.

469

470 **S10. Optimal decoder for noisy gradients without embryo length variation.**

471 Given the distribution of input signal, the decoder structure can be properly shaped to  
472 best utilize the available information, hence minimizing output error. This optimal  
473 decoding idea is commonly used in biological scenarios, ranging from neural sciences  
474 to developmental biology<sup>23</sup>. However, to get meaningful results via this approach,  
475 there should be much insight about the exact form of input fluctuations that the  
476 decoder really cares about – although minimizing output noise is always “a good  
477 thing”, in many real-world situations, the decoder structure is shaped mainly by the  
478 requirements of other (more important) functions, not just by the simplest form of  
479 input noise alone.

480

481 In the case of *Drosophila* A-P patterning, we have considered two types of input  
482 fluctuations: noisy morphogen gradients and fluctuation in embryo length. We reason  
483 that the real-world *Drosophila* decoder must deal with both kinds of noise (especially  
484 the latter, i.e., scaling), since the decoder should function in all cells in all embryos of  
485 different lengths. Therefore, a decoder optimally designed only for noise attenuation  
486 in  $L=1$  embryos is actually *not* optimal, by definition, for the *Drosophila* species in  
487 natural environment. In this section, we discuss the difference between the full scaling  
488 decoder (that in the main text, which takes into consideration both types of noise) and  
489 the optimal noise attenuation decoder where fluctuation in  $L$  is not considered. By  
490 these analyses, we emphasize the importance of having the *correct* form of input  
491 noise in obtaining the *correct* optimal decoder structure.

492

493 The first situation studied here is called “noise-only decoder”, where the Poisson  
494 noise term on morphogen gradients is the same as in Fig. 2d, but  $L$  is now fixed to be  
495 1 instead of being a random variable. The second model is a more drastic  
496 simplification, that morphogen noise is assumed to be vanishingly small. In this limit,  
497 each  $m(y)$  point is blurred into a small 3-d sphere, therefore, the optimal decision

498 plane separating adjacent “spheres” is just the normal plane of  $m(y)$ . We call it the  
499 “null model”, as it represents the most naïve form of “optimal” decoder one may  
500 imagine. Systematic investigation of the “noise-only decoder” and the “null model”,  
501 in comparison with the full “scaling decoder” in the main text, is summarized in Fig.  
502 S10.

503

504 First, the noise-only decoder and the null model *are* different from the optimal scaling  
505 decoder. This can be seen by direct visualization of the decision planes (Fig. S10a, e,  
506 i), which is further highlighted by the different extrapolations on the Bcd-mHb plane  
507 (Fig. S10b, f, j). Some of the differences are marked by arrowheads. Also, the  
508 morphogen contribution plots are different in three models (Fig. S10c, g, k). In Fig.  
509 S10d, h, the decoding result of these two other models on the full WT point cloud  
510 (that of Fig. 2d in the main text) are shown, scaling errors are in general larger  
511 compared to the scaling decoder (Fig. S10L). Therefore, the noise-only decoder and  
512 the null model are no longer optimal if fluctuations in embryo length are considered.

513

514 These structural differences are significant, since they lead to observable differences  
515 in mutant predictions (Fig. S10m, n, o). Predictions of our scaling decoder (panel o)  
516 match experiments the best, while the noise-only decoder or the null model has  
517 prediction error typically on the order of  $>5\%$  embryo length (marked by  
518 arrowheads).

519

520 As an example, consider the vi-vii boundary (*gt-hb* boundary). In the scaling decoder,  
521 Bcd plays a non-negligible role near the posterior pole to allow for scaling (Fig. S10k).  
522 Graphically, the vi-vii boundary is inclined up (Fig. S10i, arrow head). This feature is  
523 supported by experimental measurements, that the posterior *hb* domain expands  
524 anteriorly in *bcd* (Fig. 4b, Fig. S10r). However, this is not captured by the null model  
525 (Fig. S10q), nor the noise-only decoder (Fig. S10p), where this boundary is nearly

526 parallel to the Bcd-mHb plane (Fig. S10a, e, arrowheads). In this example, the scaling  
527 decoder *is* the best description of *Drosophila* gap gene system among the three, as it  
528 predicts the mutant situation the most precisely.

529

530 Fig. S10s&t is in parallel with Fig. 5a of the main text, albeit for the noise-only and  
531 null models. Especially, the null model predicts that *Kr* and *kni* domains should  
532 disappear at nearly the same *L*, which contradicts experiments<sup>7</sup> qualitatively. Fig. S10  
533 u&v is about the issue of cephalic furrow, in parallel with the main text Fig. 5f-h.  
534 Admittedly, the noise-only decoder predicts the CF position as satisfactorily as the  
535 scaling decoder. But the null model failed to predict the robustness of  $X_{CF}$  with  
536 respect to Bcd dosage change (Fig. S10v), which is the most important feature here.

537

538 In summary, the analyses above demonstrate that scaling has indeed introduced some  
539 additional (and correct) constraints on the decoder structure, beyond merely decoding  
540 noisy gradients at fixed embryo length. The gap gene system seems to be “optimized”  
541 for both the kinds of fluctuations: noisy morphogen gradients and that in embryo  
542 length.

543



544 **S11. Implementing the scaling decoder with a dynamical gene regulation model.**

545 In this section, we present an ordinary differential equation (ODE) model which  
546 realizes the phenomenological scaling decoder for the *Drosophila* case.

547

548 The idea is fully illustrated by the toy model in Fig. 6a-c, although the gap gene  
549 network has more degrees of freedom and more scaling boundaries, and does not  
550 necessarily have to reach a dynamical attracting point. As we show below, after being  
551 properly fitted, the ODE gap gene regulation model turned out to have basically the  
552 same input-output relations as the previous phenomenological decoder. It also has  
553 satisfactory predictions on mutant patterns.

554

555 Under the local-readout hypothesis, diffusion of gap gene products is ignored. At each  
556 spatial point, the ODE model calculates the synthesis rates out of the current gap gene  
557 product ( $\mathbf{P}$ ) and morphogen ( $\mathbf{M}$ ) levels. (Degradation coefficient is simply set to a  
558 fixed value  $\gamma=0.05 \text{ min}^{-1}$ .)

559 
$$\frac{d}{dt} \mathbf{g} = \mathbf{f}(\mathbf{P}, \mathbf{M}) - \gamma \mathbf{g}$$

560 Here we model the regulation logics of anterior and posterior *hb* domains separately,  
561 since they are known to be generated by different regulation rules even at a coarse  
562 grained level<sup>24,25</sup>. Similar situation applies to the two *gt* domains<sup>26,27</sup>. Therefore, a  
563 total of 7 “gap genes” are considered.

564 
$$\mathbf{g} = (g_1, \dots, g_7) = (hb_a, hb_p, Kr, kni, gt_a, gt_p, tll)$$

565 Since *hb<sub>a</sub>* and *hb<sub>p</sub>* encode the same Hb protein,  $\mathbf{P}$  has only 5 components.

566 
$$\mathbf{P} = (g_1+g_2, g_3, g_4, g_5+g_6, g_7)$$

567 And in the input term  $\mathbf{M}$ , we consider Bcd, Tor and Caudal (Cad, which is shaped by  
568 translational repression from Bcd directly, and its profile is fitted to the measurements  
569 of Ref.<sup>13,28</sup>.  $\text{Cad} = 1/(1 + 1250 * \text{Bcd}^{2.47})$ ).

570

571 The mHb profile is used as the initial condition of  $hb_a$ , and the rest  $g$  dimensions are  
 572 initialized at zero.

573

574 The  $f$  term implements the known gap gene interactions reviewed in Ref.<sup>24</sup> (Fig. 6d  
 575 and Table S2) with a set of Hill-function-like formulas defined as follows. For  
 576 example, if  $P_j$  plays an activating role in  $f_i$ , the corresponding term is:

$$577 \quad f_i^j = v_{ij} \cdot \sigma(P_j, K_{ij}, b_{ij}).$$

578 Instead, if the regulation role is inhibitory,

$$579 \quad f_i^j = 1 - \sigma(P_j, K_{ij}, b_{ij}).$$

580 Here,  $\sigma$  is an S-shaped function with  $K$  and  $b$  as its parameters.

$$581 \quad \sigma(x, K, b) = \frac{s(K(x - b)) - s(-Kb)}{1 - s(-Kb)}, \quad \text{where } s(z) = \frac{1}{1 + \exp(-z)}$$

582 This function mimics the Hill function, with  $K$  and  $b$  together defines the steepness  
 583 and half-maxima position of the S-shaped curve. These are free parameters to be fitted.

584 Our reason for choosing this function form is purely technical – it performs better in  
 585 parameters optimization by gradient descent than the original Hill function. Taken  
 586 together, when a gap gene is regulated by multiple factors, the activation terms are  
 587 summed and multiplied by the repression terms.

$$588 \quad f_i = \left( \sum_{Act.} f_i^j \right) \left( \prod_{Inh.} f_i^j \right) \quad i = 1 \dots 6$$

589 An exception is *tailless* (*tll*). As *tll* is known to act upstream of the gap gene network,  
 590 and is shaped mainly by Tor and Bcd<sup>29</sup>, here we explicitly write down the equation  
 591 for *tll* using Hill functions.

$$592 \quad f_7 = \frac{1}{1 + \left(\frac{Bcd}{0.011}\right)^4} \left( 1 - \frac{1}{1 + \left(\frac{Tor}{0.07}\right)^2} \right)$$

593

594 With the above dynamical equations and initial condition, the model is integrated  
 595 numerically at each embryonic position (101 discrete points along the A-P axis)

596 independently, as we ignore diffusion of the gap gene products. The model trajectory  
597 is compared with the measured WT profiles <sup>30</sup> in the following two aspects to define  
598 the Loss function for parameter fitting:

599 (1) Averaged temporal trajectory. Those protein profiles in <sup>30</sup> are measured in the 14<sup>th</sup>  
600 nucleus cleavage cycle (n.c.14) at the blastoderm stage. We smoothed those  
601 profiles both spatially and temporally, and extracted 7 equally-spaced frames  
602 between 8 and 41 minutes into n.c.14. (The  $t=41$ min frame is the one shown in  
603 Fig. 2b of main text). The model trajectory for a  $L=1$  embryo is compared with  
604 these frames at the corresponding time steps, defining the first term in Loss  
605 function.

606 (2) Scaling. We simulate a batch of 16 embryos with  $L$ 's sampled from the normal  
607 distribution  $N(0, 0.15)$ . Obviously, these embryos may have different gap gene  
608 patterns in the initial simulation steps due to their different initial profiles of *hb*.  
609 Therefore, to impose scaling, we add a second Loss term penalizing pattern  
610 differences *only* at the final frame ( $t=41$  min into n.c.14).

611 Parameter fitting is then carried out using the Adam optimizer implemented in  
612 Tensorflow. Note that no mutant information is used for fitting. Table S2 lists a  
613 typical fitted parameter set.

614

615 To evaluate the fitted model, we generate a set of WT morphogen profiles with  $L$   
616 ranging from 0.85 to 1.15 according to Eqn. 5 (Fig. S11a). The ODE model  
617 successfully evolves to yield final patterns that scale with embryo lengths (Fig. S11b),  
618 and it indeed shows the overall structure quite similar to the phenomenological  
619 decoder (Fig.6e, f, main text). This is expected, as we have shown previously that any  
620 scaling local decoding scheme should follow the structure of our phenomenological  
621 decoder. Fig.6e shows the  $Tor=0$  section (corresponding to the  $\alpha$  plane of Fig.3a).  
622 Here, colors stand for the high-expressing gap gene given by the gene-circuit  
623 dynamics at the “final” timepoint. Dashed black lines represents the same linear

624 classification planes as in Fig. 3a. Also note that in Fig. 6e-f, outside the WT region,  
625 domain boundaries of this ODE model indeed extend in an almost linear manner,  
626 supporting our linear extrapolation hypothesis.

627

628 As expected, having the correct decoder geometry for scaling should naturally lead to  
629 correct predictions on mutants (Fig. S11c, even gap gene mutants (Fig. S11e) which is  
630 not covered by the phenomenological decoder framework). To further evaluate these  
631 predictions in a quantitative way, we compared the predicted and measured positions  
632 of each gap gene expression domain (peaks and boundaries) in 9 different maternal  
633 morphogen mutants (*bcd*<sup>-</sup>, *nos*<sup>-</sup>, *tor*<sup>-</sup>, *bcd1X*, *bcd4X*, *bcd*<sup>-</sup>*nos*<sup>-</sup>, *bcd*<sup>-</sup>*tor*<sup>-</sup>, *nos*<sup>-</sup>*tor*<sup>-</sup>,  
634 *mhb*<sup>-</sup>*tor*<sup>-</sup>), and the root mean square error is only 3.3% embryo length (EL). This is an  
635 impressive result. To our knowledge, it has not been reported in previous literatures  
636 that a gap gene regulation model (if fitted with WT data only) can make correct  
637 predictions in these knockout mutants.

638

639 As a negative control (Fig. S11g) to emphasize the importance of the quantitative  
640 constraints imposed by scaling, we also fit this model with the scaling requirement is  
641 removed from fitting. The resulting model shows no scaling property and hence  
642 incorrect mutant predictions (Fig. S11 g, h, i)

643

644 We also implement the scaling decoder using another widely used gene circuit  
645 modeling scheme<sup>31-33</sup>. The only difference is in the form of the *f* term (with  $\gamma = 0.035$   
646 min<sup>-1</sup>), and the regulation network itself emerged through data fitting (as the sign of  
647 the regulation matrixes *W* and *V*).

$$648 \quad \frac{d}{dt}g_i = \sigma\left(\sum_j W_{ij}P_j + \sum_k V_{ik}M_k + b_i\right) - \gamma g_i ; \quad \sigma(x) = \frac{1}{1 + e^{-x+3}}$$

649 The resulting effective decoder structure and predictions on mutants are also similarly  
650 satisfactory (Fig. S12). See Table S3 for model parameters.

651

652 The last thing needs to be noted here is diffusion of the gap gene products, through  
653 which decoders in adjacent nuclei may communicate with each other, going beyond  
654 the “local-decoding paradigm”. However, remind that “local-decoding” is in fact a  
655 more stringent requirement. Although diffusion is a physical effect and can never be  
656 shut down in reality, it has been pointed out by the authors of “gene circuit model”<sup>32</sup>  
657 that their model does not actually rely on diffusion of the gap proteins – shutting  
658 down diffusion *in silico* does not affect any dynamical process of their model albeit  
659 making the resulting profile less smooth. Similarly, our ODE model here does not  
660 include the effect of diffusion, but adding a diffusion term,

$$661 \quad \frac{d}{dt} \mathbf{g}(x) = D \nabla^2 \mathbf{P} + \mathbf{f}(\mathbf{P}(x), \mathbf{M}(x)) - \gamma \mathbf{g}(x),$$

662 appears only to smooth the established spatial pattern, not affecting scaling (Fig.  
663 S11k). Here, diffusion constant is set to  $0.3 \mu\text{m}^2/\text{s}$ , twice as that estimated using the  
664 exponential tail of the measured gap gene protein pattern of the *FlyEX* database<sup>12,13</sup>  
665 (Fig. S11i, j). In Fig. S11k, the parameter sets listed in Table S2 was used, which is  
666 fitted in the absence of diffusion. The model would be compatible to even stronger  
667 diffusion if such diffusion effect is considered during parameter fitting.

668

669

670 **S12. Nos/mHb as the posterior gradient.**

671 Our work is largely inspired by the bi-gradient model. The original bi-gradient models  
672 <sup>20,34</sup>, however, are not widely accepted partly because they introduced a hypothetical  
673 (and non-existent) posterior gradient. This hypothetical gradient is needed because Nos  
674 was ruled out from the very beginning, based on the observations by (and only by)  
675 Ref.<sup>4</sup> that positional variability of Hb boundary do not seem to be seriously affected in  
676 *nos*<sup>-</sup> or *mhb*<sup>-</sup> embryos. By contrast, in our model mHb/Nos *is* the second gradient.  
677 Below, we demonstrate that the observations in <sup>4</sup> can in fact be well explained with  
678 the updated understanding of Bcd gradient since 2002, namely, it has very low noise  
679 and its amplitude partially scales with the embryo length. Therefore, those  
680 observations cannot rule out mHb/Nos; a hypothetical posterior gradient is not  
681 actually needed.

682

683 There are two arguments relevant to this topic in the 2002 paper by Houchmandzadeh  
684 et al. <sup>4</sup>. First, if Nos/mHb is the factor that helps setting Hb-Kr boundary (Tor is  
685 effectively zero here) together with Bcd, then in *nos*<sup>-</sup> or *mhb*<sup>-</sup> embryos, positional  
686 noise of the Hb boundary should follow that of Bcd. The observed positional error of  
687 Hb boundary increases from 1%EL (WT) to 1.6%EL (*nos*<sup>-</sup>), while the positional noise  
688 of Bcd measured by <sup>4</sup> is almost 30%EL. There seem to be a big gap. However, as has  
689 been correctly pointed out later by Gregor et al., <sup>18</sup>, this 30% positional error of Bcd  
690 profile is an artifact due to inappropriate normalization; and the true Bcd positional  
691 error should be around 1~2% EL if measured with GFP-tagged Bcd and normalized  
692 properly <sup>18,35</sup> (and Fig. S2). Therefore, this first argument is invalid from the current  
693 point of view. Hb boundary noise *is* at the same level of Bcd in *nos*<sup>-</sup> or *mhb*<sup>-</sup>  
694 background.

695

696 A second related observation of Ref.<sup>4</sup> is that, scaling of the Hb boundary seems not to  
697 be completely destroyed in *nos*<sup>-</sup> or *mhb*<sup>-</sup> embryos: its absolute position (measured

698 from the anterior pole, in  $\mu\text{m}$ , denoted as  $x_{hb}$ ) remains to depend on embryo length  
699 (with a linear correlation coefficient about 0.7). We think this evidence is also not  
700 sufficient for excluding mHb/Nos. This correlation can be explained by the Bcd  
701 amplitude effect – that larger embryo tends to have higher absolute level of Bcd<sup>5</sup> (and  
702 SI-1). This amplitude effect (which is even slightly underestimated if setting  $\beta=2$  as in  
703 Eqn. 5a) makes the *hb* boundary appear to be partially scaling, even if it is determined  
704 solely by Bcd threshold:

$$705 \quad \left. \frac{\partial x_{hb}}{\partial L} \right|_{L=1} = \beta \lambda_B \approx 0.33 \quad (S12.1)$$

706 The *hb* boundary locates near the center of embryo. Thereby this quantity should be  
707 approximately 0.5 for perfect scaling, and equals to 0 for non-scaling as naively  
708 expected. The seemingly partially preserved scaling in *nos*<sup>7</sup> or *mhb*<sup>7</sup> can be explained in  
709 this way.

710

711 **S13. Discussion on the long-germband insect *Megaselia abdita*.**

712 Geometrically speaking, in our framework scaling stems from quantitative matching  
713 of the decoder decision boundaries with the  $y$ -constant curves. On the other hand,  
714 from the regulatory perspective, it is equivalent to say that all three morphogen levels  
715 change as  $L$  varies, but their effects on the entire gap gene network should cancel out  
716 (at the linear order) to give unchanging outputs. This kind of precise cancellation  
717 relies on quantitative tuning of regulatory link strengths in the gap gene network.  
718 Such “fine-tuning” may not seem to be a reliable mechanism at a first glance.  
719 However, it is consistent with the current understanding of the *evolution* of the gap  
720 gene network. The maternal morphogen system is very diverse among different long  
721 germband insects, but gap gene cross regulation network is much more conserved<sup>24</sup>.  
722 We suggest that by tuning its link strengths quantitatively, a long-germband insect  
723 species can easily make the “ancient” gap gene network adapt to its specific maternal  
724 morphogen system and achieve scaling patterning.

725

726 We would like to briefly discuss, with our scaling framework, another long-germband  
727 insects with different sets of maternal morphogen gradients – *Megaselia abdita*. As  
728 experimental data (especially on mutants) are very limited, we cannot discuss this  
729 point in depth. Like *Drosophila*, *Megaselia* also have Bcd and mHb. The mHb profile  
730 is very similar to that of *Drosophila*, but Bcd extends more to the posterior<sup>36,37</sup>.  
731 Different morphogen shapes lead to different geometry of the WT point clouds (Fig.  
732 S13a), hence different predictions on mutants. In the case of more extended Bcd,  
733 when the decision boundary is linearly extrapolated to predict *bcd*<sup>+</sup>, the *kni* domain  
734 expands and the *Kr* domain disappears completely (Fig. S13 illustrates this point with  
735  $\lambda_{\text{Bcd}}=0.225$ ), which is qualitatively the situation observed in *bcd*<sup>+</sup> *Megaselia*<sup>38</sup>.

736



737 **Supplemental Figure legends.**

738

739 **Fig. S1.** The mHb profile can be fitted by a sigmoidal curve. The Hb protein profile in  
740 n.c.12 embryos are regarded as maternal Hb here. Data cited from the *FlyEX*  
741 database.

742

743 **Fig. S2.** Simulating noise in the Bcd gradient by a Poisson noise term. Black curve:  
744 positional error (standard deviation  $\sigma_y$ ) calculated according to Eqn. S2.2 (with  
745  $N_0=1000$ ,  $\lambda_B=0.165$ , and  $\beta=2$ ). Blue/green data points: the measured Bcd positional  
746 error<sup>18</sup>, without/with the known measurement error being subtracted. The Poisson  
747 noise term simulates Bcd noise correctly in the region  $0.2 < y < 0.6$ .

748

749 **Fig. S3.** Predicting mutant fate-map with linear classifiers. **(a)** A graphical illustration  
750 of predicting the fate of  $y_{\text{mut}}=0.4$  point in *bcd<sup>tor</sup>* mutant. Grey and white pixels stand  
751 for different classifier outputs on this point. **(b)** A typical case where the “posterior  
752 dominant rule” should be employed. A linear classification plane fitted at the anterior  
753 (#20 here) intersected with much more posterior parts of the WT point cloud, far  
754 away from where the #20 plane was fitted. Hence its classification on those posterior  
755 points (yellow rectangle) should be ignored. **(c)** By listing the outputs of all  
756 classification planes on all points form a mutant embryo, the predicted fate map is the  
757 grey-white boundary. Those outputs ignored by the “posterior dominant rule” are  
758 shown in lighter color.

759

760 **Fig. S4.** Effects of the Bcd  $\beta$  factor and noise amplitude on model performance. **(a)**  
761 By re-adjusting the classification orientations, a scaling phenomenological decoder is  
762 also obtained without the Bcd amplitude factor. It finds the correct  $\tilde{y}$  values with  
763 relatively small error (RMSE~1%) for WT embryos with length variations. **(b-c)**  
764 Though scaling is not affected by dropping the amplitude factor, the geometry of the

765 WT point cloud hence the corresponding mutant phenotypes do change (marked by  
766 the arrowhead in panel **c**). **(d)** Setting  $\beta$  to 3 does not have much influence on the  
767 mutant predictions, compared with Fig. 3d of the main text. **(e-f)** With the settings in  
768 the main text ( $\beta=2$ ), changing the Poisson noise strength do not affect our main results.  
769 The predictions are still satisfactorily consistent with experiments.

770

771 **Fig. S5.** The Bayesian decoder. **(a)** Decoding error for the WT ensemble in Fig.2d of  
772 main text. **(b)** The Root-Mean-Squared decoding error is on the same order as our  
773 linear decoder. Though arbitrary nonlinear boundary geometry is allowed by the  
774 Bayesian decoder, its error is even larger than the linear one. **(c)** Bayesian decoder  
775 outputs. Within the region covered by the WT point cloud, they are quite similar to  
776 the linear decoder outputs. While there is much difference away from the WT point  
777 cloud. Dashed black lines are the same as Fig.3a in the main text. **(d)** Tangential  
778 views of the iv-v and v-vi *linear* classification planes of the decoder used in main text.  
779 The remaining classification error is due to the Poisson noise rather than nonlinearity  
780 in the domain interface geometry.

781

782 **Fig. S6.** Outputs of the scaling decoder on  $mHb=0$  and  $mHb=mHb_0$  planes. The 3-d  
783 orientations of the decision planes naturally explains that while *nos<sup>-</sup>* embryos have lost  
784 the abdominal fates (domains v & vi), *nos<sup>-</sup>mhb<sup>-</sup>* embryos still have these two domains  
785 just as WT.

786

787 **Fig. S7.** Maternal morphogen mutant embryos with greatly changed length. **(a)** A  
788 graphical illustration of the prediction in Fig. 4a of the main text. **(b)** Measured gap  
789 gene domain positions in normal-length and greatly shortened *bcd<sup>-</sup>* embryos<sup>7</sup>. The  
790 narrow anterior *gt* domain is not shown here. **(c)** Overlapping panels A and B for  
791 comparison. **(d)** Predicted and measured gap gene domain boundaries in greatly  
792 shortened *bcd6X* embryos. Solid lines, model prediction; dots, measurements by Ref.<sup>7</sup>.

793 (e) Analytical calculation of the *hb* boundary position in *bcd6X* embryos of varying  
794 lengths. The black curve follows Eqn. S7.2, with parameters  $\lambda_B=0.165$ , and  $\beta=2$ . (f)  
795 Predicted gap gene domain positions of many other maternal morphogen mutants with  
796 greatly changed  $L$ 's. The horizontal dashed lines mark typical range of natural length  
797 variation within a fly line.

798

799 **Fig. S8.** The three maternal gradients function as two bi-gradient pairs. (a-c) Size  
800 sensitivity  $S_L$  evaluated at  $L=1$ . This quantity is equivalent to absolute slopes of the  
801 domain boundaries in Fig. 5a, c, d in the main text.  $S_L$  is low everywhere in the WT  
802 embryo, indicating good scaling (black,  $S_L < 0.1$ ). Missing Bcd (a) destroys scaling  
803 completely (purple), while missing the posterior (b) or terminal (c) morphogen only  
804 affects scaling in part of the embryo. The dashed grey lines show the non-scaling  
805 baselines of  $S_L$ . (d) Contribution of each morphogen (defined in Section S8) in  
806 discriminating adjacent positions in WT embryos. Bcd forms bi-gradient pair with  
807 mHb in the middle part, and with Tor near both ends. Note that morphogen  
808 contributions are different for different embryo lengths. Note that mHb seems to play  
809 a more important role in larger embryos. (e) Therefore, the same perturbation in Nos  
810 should introduce more severe segmentation defects for larger embryos. Here, we  
811 present predictions on larger and smaller embryos with reduced Nos dosage/activity.  
812 Gap gene pattern should be basically normal-looking for  $L=0.7$ , while for  $L=1.3$  the  
813 *Kr* domain should expand greatly. This prediction may be checked experimentally in  
814 the future.

815

816 **Fig. S9.** Shift of the *even-skipped* (*eve*) stripes under Bcd dosage change. (a)  
817 Predictions with or without the other two maternal morphogens. (b) A  
818 semi-quantitative comparison with the experimental measurements in Ref.<sup>22</sup>.

819

820 **Fig. S10.** Optimal decoder for noisy gradients with or without length variation. Here,  
821 “scaling decoder” stands for the model studied in the main text. The “noise-only  
822 decoder” is defined similarly –  $L$  is fixed to 1 in generating the WT point cloud, while  
823 the Poisson noise term is the same as the scaling decoder. “Null model” is the most  
824 naïve form of linear decoder, that the decision planes are always defined to be normal  
825 to the (Bcd, mHb, Tor) curve. **(a-h)** Geometry, contribution of each morphogen, and  
826 performance in decoding the full-version WT point cloud (i.e., that in Fig.2d main  
827 text) of the noise-only decoder and the null model They differs from the scaling  
828 decoder **(i-l)** significantly. **(m-o)** The scaling decoder turns out to be a better  
829 description of the real *Drosophila* gap gene system; its predictions (grey-white  
830 boundary, as in Fig. S3) on mutant patterns match the best with experiments (black  
831 dots). For the noise-only decoder and the null model, where their prediction deviates  
832 from the experiments are marked by red arrowheads. **(p-r)** According to the scaling  
833 decoder, Bcd should play a non-negligible role even near the posterior pole. This is  
834 supported by experiments (expansion of the posterior *hb* domain in *bcd*). Note that  
835 this feature is not captured by either the null model or the noise-only decoder. **(s-v)**  
836 Analysis of the noise-only decoder and the null model following Fig. 5a and f-h of the  
837 main text.

838

839 **Fig. S11.** The ODE-based gap gene regulation model. **(a)** The morphogen profiles for  
840  $L$  ranging from 0.85 to 1.15 following Eqn. 5. These morphogens define the external  
841 inputs and initial condition of an ordinary differential equation model for the gap gene  
842 network. Note that mHb is multiplied by a factor 4 for better visualization. **(b)** This  
843 gene regulation model generates scaling gap gene pattern by reading the non-scaling  
844 morphogens in panel A. The requirement of scaling is included in parameter fitting.  
845 **(c)** Mutant Predictions (solid lines) and corresponding measured profiles (dashed  
846 lines, cited from Refs.<sup>6</sup> and<sup>21</sup>). **(d)** A systematic assessment of mutant predictions.  
847 Predicted vs. measured positions of peaks and boundaries of the gap gene domains are

848 shown. The predicted positions have a root-mean-square-error (RMSE) of around 3.3%  
849 embryo length, which is quite impressive. **(e)** This model even has reasonable  
850 predictions on gap gene mutants. Take the *Kr* mutant as an example here.  
851 Semi-quantitatively, without *Kr*, the posterior *gt* domain should expand anteriorly and  
852 eliminate the *kni* domain by inhibition. This is exactly the situation observed in  
853 experiments<sup>26,39</sup>. **(f-h)** Regulation network topology alone cannot ensure scaling. **(f)**  
854 The ODE model failed to achieve scaling if scaling is not explicitly introduced in  
855 parameter fitting. **(g-h)** When being viewed as a decoder of maternal morphogens, its  
856 structure deviates from that of our phenomenological scaling decoder (dashed lines).  
857 Having the “correct” regulation network topology (identical to Fig. 6d) is not enough  
858 for scaling. Quantitative features matter. **(i-j)** Estimating diffusion constant for the gap  
859 gene products using the “exponential tails” in the protein profiles. Half-life of the Hb  
860 or Kr protein is assumed to be 14 min. Note that this is only a rough estimation. **(k)**  
861 The scaling ODE model of panel B is robust to diffusion. The resulting pattern  
862 remains normal and scaling, albeit smoothed by diffusion. Diffusion constant here is  
863 relatively large, twice the estimated value.

864

865 **Fig. S12.** The scaling gene circuit model. **(a)** With its parameters being properly fitted,  
866 using the Loss function defined in Section S11, the gene circuit model generates  
867 scaling output pattern successfully. **(b)** The equivalent decoder structure also follows  
868 the phenomenological linear decoder (dashed lines). **(c)** The gap gene cross regulation  
869 network emerges from data fitting. **(d-e)** This gene circuit model also has satisfactory  
870 predictions on maternal morphogen mutants, as expected. **(f)** It can also reproduce Fig.  
871 5a-d of the main text, reflecting its structural similarity with the phenomenological  
872 scaling decoder.

873

874 **Fig. S13.** Generating scaling *Drosophila* gap gene pattern with a more extended Bcd  
875 profile. **(a)** Increasing the Bcd length constant (from 0.165 used in main text to 0.225

876 here) leads to “stretching” of the WT point cloud. The decision boundaries of a  
877 scaling decoder are also shifted (dashed black lines). **(b)** As a result, by extrapolating  
878 with these decision planes, the fate corresponding to the *Kr* expression domain (iv) no  
879 longer presents on the Bcd=0 plane. Compare this panel with Fig. 3a-b to see this  
880 difference. Therefore, in a semi-quantitative sense, *bcd* embryo should no longer  
881 have a *Kr* domain with this more extended Bcd. Note that the *Drosophila* gap gene  
882 positions are used in this figure, making it comparable with Figs. 2 and 3 in the main  
883 text.  
884

885

**Table S1.** Peak and boundary positions extracted from maternal morphogen mutants.

| <i>wt</i>  |      | <i>bcd1X</i> |      | <i>bcd4X</i> |      | <i>bcd'</i> |      | <i>nos'</i> |      |
|------------|------|--------------|------|--------------|------|-------------|------|-------------|------|
| Pos (% EL) | name | pos          | name | pos          | name | pos         | name | pos         | name |
| 12.8       | hb1L | 14.8         | hb1L | 15.6         | hb1L | 18.1        | hb2P | 18.2        | hb1L |
| 47.4       | hb1R | 40.8         | hb1R | 56.6         | hb1R | 11.5        | hb2R | 50.5        | hb1R |
| 80.8       | hb2P | 80.7         | hb2P | 84.8         | hb2P | 25.8        | hb2L | 82.8        | hb2P |
| 74.8       | hb2L | 74.2         | hb2L | 79.4         | hb2L | 77.7        | hb2P | 74.6        | hb2L |
| 87.7       | hb2R | 86.5         | hb2R | 89.3         | hb2R | 68          | hb2L | 89          | hb2R |
| 51.6       | krP  | 46.5         | krP  | 60.6         | krP  | 86.2        | hb2R | 56.6        | krP  |
| 45.8       | krL  | 40.3         | krL  | 55.4         | krL  | 39.4        | krP  | 50          | krL  |
| 58.5       | krR  | 54.3         | krR  | 66.1         | krR  | 32.2        | krR  | 67.4        | krP  |
| 61.6       | kniP | 58.5         | kniP | 68.7         | kniP | 47.1        | krR  | 38.3        | gt1P |
| 56.5       | kniL | 52.5         | kniL | 64.4         | kniL | 47.4        | kniP | 23.8        | gt1L |
| 66.6       | kniR | 63.9         | kniR | 72.7         | kniR | 35.8        | kniL | 43.5        | gt1R |
| 35.4       | gt1P | 28.3         | gt1P | 44.4         | gt1P | 55.6        | kniR |             |      |
| 20         | gt1L | 18.9         | gt1L | 26.6         | gt1L | 26.3        | gt2P |             |      |
| 40.9       | gt1R | 33.5         | gt1R | 49.4         | gt1R | 21.9        | gt2R |             |      |
| 69.7       | gt2P | 67.7         | gt2P | 74.8         | gt2P | 31.5        | gt2L |             |      |
| 64.7       | gt2L | 62.6         | gt2L | 71           | gt2L | 58.6        | gt2P |             |      |
| 74.8       | gt2R | 73.5         | gt2R | 79.9         | gt2R | 50.8        | gt2L |             |      |
| 8          | otdL |              |      |              |      | 69          | gt2R |             |      |
| 26         | otdR |              |      |              |      |             |      |             |      |
| 22         | emsL |              |      |              |      |             |      |             |      |
| 31         | emsR |              |      |              |      |             |      |             |      |
| 25         | btdL |              |      |              |      |             |      |             |      |
| 33         | btdR |              |      |              |      |             |      |             |      |

886

887

888 Table S1 continued.

| <i>tor-</i> |      | <i>bcd-tor-</i> |      | <i>nos-tor-</i> |      | <i>bcd-nos-</i> |      | <i>nos-tor-mhb-</i> |      |
|-------------|------|-----------------|------|-----------------|------|-----------------|------|---------------------|------|
| pos         | name | pos             | name | pos             | name | pos             | name | pos                 | name |
| 48.4        | hb1R | 10              | krP  | 3.32            | hb1L | 17.2            | hb2P | 42.7                | hb1R |
| 53.6        | krP  | 29              | krP  | 49.6            | hb1R | 11.2            | hb2R | 46.7                | krP  |
| 47.5        | krL  | 47.1            | krR  | 60              | krP  | 25.3            | hb2L | 40                  | krL  |
| 60.9        | krR  | 51.6            | kniP | 80              | krP  | 82.8            | hb2P | 55                  | krR  |
| 65.6        | kniP | 43.1            | kniL | 49.3            | krL  | 74.8            | hb2L | 60                  | kniP |
| 59.2        | kniL | 62.6            | kniR | 33.3            | gt1P | 89.4            | hb2R | 53                  | kniL |
| 72.5        | kniR | 55.5            | gt2L | 9.9             | gt1L | 50              | krP  | 69.7                | kniR |
| 35.4        | gt1P | 70              | gt2P | 39.3            | gt1R | 33.2            | krR  | 30                  | gt1P |
| 11.2        | gt1L |                 |      |                 |      | 66.6            | krR  | 11.1                | gt1L |
| 41.1        | gt1R |                 |      |                 |      | 25.2            | gt2P | 35.4                | gt1R |
| 78.8        | gt2P |                 |      |                 |      | 20.2            | gt2R | 76                  | gt2P |
| 70.7        | gt2L |                 |      |                 |      | 29.2            | gt2L | 66                  | gt2L |
|             |      |                 |      |                 |      | 74.8            | gt2P |                     |      |
|             |      |                 |      |                 |      | 70.5            | gt2L |                     |      |
|             |      |                 |      |                 |      | 80              | gt2R |                     |      |

889

| 6Bvas-exu- |      |
|------------|------|
| pos        | name |
| 40         | otdR |
| 50         | emsR |
| 56         | btdR |
| 24         | emsL |
| 30         | btdL |
| 82         | otdR |
| 80         | emsR |
| 78         | btdR |
| 90         | emsL |
| 85         | btdL |

890

891

892



**Table S2.** Parameters for the scaling ODE model.

| Regulation link | Sign | W     | b       | c      |
|-----------------|------|-------|---------|--------|
| Hb to hb-a      | Act. | 12.86 | 8.1300  | 0.2665 |
| Kr to hb-a      | Inh. | 9.674 | -3.5490 | /      |
| Kni to hb-a     | Inh. | 33.98 | 10.6600 | /      |
| Bcd to hb-a     | Act. | 27.03 | 6.7250  | 0.8884 |
| Tor to hb-a     | Inh. | 3.265 | 9.8870  | /      |
| Kr to hb-p      | Inh. | 16.35 | 8.4220  | /      |
| Kni to hb-p     | Inh. | 17.12 | 8.8830  | /      |
| Tll to hb-p     | Act. | 32.97 | 9.9490  | 2.2230 |
| Tor to hb-p     | Inh. | 8.948 | 10.9600 | /      |
| Hb to Kr        | Inh. | 5.909 | -0.3211 | /      |
| Kni to Kr       | Inh. | 11.4  | -2.7410 | /      |
| Gt to Kr        | Inh. | 20.2  | 2.4620  | /      |
| Tll to Kr       | Inh. | 25.35 | 9.1960  | /      |
| Bcd to Kr       | Act. | 8.417 | -0.6508 | 5.7930 |
| Cad to Kr       | Act. | 20.05 | -3.6540 | 1.5560 |
| Tor to Kr       | Inh. | 24.06 | 12.2500 | /      |
| Hb to kni       | Inh. | 38.25 | 4.3050  | /      |
| Gt to kni       | Inh. | 24.56 | -2.7790 | /      |
| Tll to kni      | Inh. | 69.30 | 10.7100 | /      |
| Bcd to kni      | Act. | /     | /       | 0      |
| Cad to kni      | Act. | 6.008 | -0.6122 | 2.0760 |
| Tor to kni      | Inh. | 3.993 | 6.9190  | /      |
| Kr to gt-a      | Inh. | 22.08 | 7.3770  | /      |
| Bcd to gt-a     | Act. | 27.1  | 2.0770  | 1.5040 |
| Tor to gt-a     | Inh. | 27.27 | 1.8270  | /      |

|             |      |       |         |        |
|-------------|------|-------|---------|--------|
| Hb to gt-p  | Inh. | 21.55 | 12.3600 | /      |
| Kr to gt-p  | Inh. | 14.45 | 2.8210  | /      |
| Tll to gt-p | Inh. | 4.086 | 9.1700  | /      |
| Cad to gt-p | Act. | 6.042 | -3.1790 | 3.3710 |
| Tor to gt-p | Inh. | 7.685 | 1.8580  | /      |

894

895

896

897 **Table S3.** Parameters for the scaling gene circuit model.

898 Weights: W&V

|     | <i>hb-a</i> | <i>hb-p</i> | <i>Kr</i> | <i>kni</i> | <i>gt-a</i> | <i>gt-p</i> |
|-----|-------------|-------------|-----------|------------|-------------|-------------|
| Hb  | -0.855      | 4.031       | -3.526    | -15.49     | 1.084       | -22.06      |
| Kr  | 1.179       | -22.44      | 4.152     | -2.664     | -14.11      | -18.03      |
| Kni | -64.61      | -11.24      | -3.721    | 6.641      | -37.88      | 3.473       |
| Gt  | 2.135       | 4.918       | -10.06    | -9.866     | -0.609      | 2.392       |
| Tll | -17.6       | -0.248      | -14.01    | -44.98     | 1.735       | -2.996      |
| Bcd | -2.911      | -38.12      | -3.172    | -8.143     | -15.35      | -31.18      |
| Cad | -3.129      | 4.412       | -1.654    | 2.084      | -8.448      | 5.898       |
| Tor | -2.928      | -3.23       | -51.2     | -4.751     | -20.07      | -5.281      |

899

900 Bias:

|        | <i>hb-a</i> | <i>hb-p</i> | <i>Kr</i> | <i>kni</i> | <i>gt-a</i> | <i>gt-p</i> |
|--------|-------------|-------------|-----------|------------|-------------|-------------|
| Bias b | 5.127       | -2.953      | 4.732     | 1.728      | 7.834       | -1.639      |

901

902

903  
904  
905  
906  
907  
908  
909  
910  
911  
912  
913  
914  
915  
916  
917  
918  
919  
920  
921  
922  
923  
924  
925  
926  
927  
928  
929  
930  
931  
932  
933  
934  
935  
936  
937  
938  
939  
940  
941  
942  
943  
944

## References

1. Bergmann, S., *et al.* Pre-steady-state decoding of the Bicoid morphogen gradient. *PLoS Biol* **5**, e46 (2007).
2. Driever, W. & Nusslein-Volhard, C. A gradient of bicoid protein in *Drosophila* embryos. *Cell* **54**, 83-93 (1988).
3. Grimm, O., Coppey, M. & Wieschaus, E. Modelling the Bicoid gradient. *Development* **137**, 2253-2264 (2010).
4. Houchmandzadeh, B., Wieschaus, E. & Leibler, S. Establishment of developmental precision and proportions in the early *Drosophila* embryo. *Nature* **415**, 798-802 (2002).
5. Cheung, D., Miles, C., Kreitman, M. & Ma, J. Scaling of the Bicoid morphogen gradient by a volume-dependent production rate. *Development* **138**, 2741-2749 (2011).
6. Liu, F., Morrison, A. H. & Gregor, T. Dynamic interpretation of maternal inputs by the *Drosophila* segmentation gene network. *Proc Natl Acad Sci U S A* **110**, 6724-6729 (2013).
7. Huang, A., Rupprecht, J. F. & Saunders, T. E. Embryonic geometry underlies phenotypic variation in decanalized conditions. *Elife* **9**, (2020).
8. Cheung, D., Miles, C., Kreitman, M. & Ma, J. Adaptation of the length scale and amplitude of the Bicoid gradient profile to achieve robust patterning in abnormally large *Drosophila melanogaster* embryos. *Development* **141**, 124-135 (2014).
9. Irish, V., Lehmann, R. & Akam, M. The *Drosophila* posterior-group gene *nanos* functions by repressing *hunchback* activity. *Nature* **338**, 646-648 (1989).
10. Hulskamp, M., Schroder, C., Pfeifle, C., Jackle, H. & Tautz, D. Posterior segmentation of the *Drosophila* embryo in the absence of a maternal posterior organizer gene. *Nature* **338**, 629-632 (1989).
11. Struhl, G. Differing strategies for organizing anterior and posterior body pattern in *Drosophila* embryos. *Nature* **338**, 741-744 (1989).
12. Poustelnikova, E., Pisarev, A., Blagov, M., Samsonova, M. & Reinitz, J. A database for management of gene expression data in situ. *Bioinformatics* **20**, 2212-2221 (2004).
13. Pisarev, A., Poustelnikova, E., Samsonova, M. & Reinitz, J. FlyEx, the quantitative atlas on segmentation gene expression at cellular resolution. *Nucleic Acids Res* **37**, D560-D566 (2009).
14. Furriols, M., Casali, A. & Casanova, J. Dissecting the mechanism of torso receptor activation. *Mech Dev* **70**, 111-118 (1998).
15. Johnson, T. K., Henstridge, M. A., Herr, A., Moore, K. A., Whisstock, J. C. & Warr, C. G. Torso-like mediates extracellular accumulation of Furin-cleaved Trunk to pattern the *Drosophila* embryo termini. *Nat Commun* **6**, 8759 (2015).
16. Coppey, M., Boettiger, A. N., Berezhkovskii, A. M. & Shvartsman, S. Y. Nuclear trapping shapes the terminal gradient in the *Drosophila* embryo. *Curr Biol* **18**, 915-919 (2008).
17. Kim, Y., *et al.* MAPK substrate competition integrates patterning signals in the *Drosophila* embryo. *Curr Biol* **20**, 446-451 (2010).
18. Gregor, T., Tank, D. W., Wieschaus, E. F. & Bialek, W. Probing the limits to positional information. *Cell* **130**, 153-164 (2007).

- 945 19. Ochoa-Espinosa, A., Yu, D., Tsirigos, A., Struffi, P. & Small, S. Anterior-posterior positional  
946 information in the absence of a strong Bicoid gradient. *Proc Natl Acad Sci U S A* **106**,  
947 3823-3828 (2009).
- 948 20. Houchmandzadeh, B., Wieschaus, E. & Leibler, S. Precise domain specification in the  
949 developing Drosophila embryo. *Phys Rev E Stat Nonlin Soft Matter Phys* **72**, 061920  
950 (2005).
- 951 21. Petkova, M. D., Tkacik, G., Bialek, W., Wieschaus, E. F. & Gregor, T. Optimal Decoding of  
952 Cellular Identities in a Genetic Network. *Cell* **176**, 844-855 e815 (2019).
- 953 22. de Lachapelle, A. M. & Bergmann, S. Precision and scaling in morphogen gradient  
954 read-out. *Mol Syst Biol* **6**, 351 (2010).
- 955 23. Bialek, W. *Biophysics: Searching for Principles*. Princeton University Press (2012).
- 956 24. Jaeger, J. The gap gene network. *Cell Mol Life Sci* **68**, 243-274 (2011).
- 957 25. Margolis, J. S., Borowsky, M. L., Steingrímsson, E., Shim, C. W., Lengyel, J. A. & Posakony, J.  
958 W. Posterior stripe expression of *hunchback* is driven from two promoters by a common  
959 enhancer element. *Development* **121**, 3067-3077 (1995).
- 960 26. Eldon, E. D. & Pirrotta, V. Interactions of the Drosophila gap gene *giant* with maternal  
961 and zygotic pattern-forming genes. *Development* **111**, 367-378 (1991).
- 962 27. Kraut, R. & Levine, M. Spatial regulation of the gap gene *giant* during Drosophila  
963 development. *Development* **111**, 601-609 (1991).
- 964 28. Manu, *et al.* Canalization of gene expression and domain shifts in the Drosophila  
965 blastoderm by dynamical attractors. *PLoS Comput Biol* **5**, e1000303 (2009).
- 966 29. Pignoni, F., Steingrímsson, E. & Lengyel, J. A. bicoid and the terminal system activate  
967 tailless expression in the early Drosophila embryo. *Development* **115**, 239-251 (1992).
- 968 30. Dubuis, J. O., Samanta, R. & Gregor, T. Accurate measurements of dynamics and  
969 reproducibility in small genetic networks. *Mol Syst Biol* **9**, 639 (2013).
- 970 31. Mjolsness, E., Sharp, D. H. & Reintitz, J. A connectionist model of development. *J Theor*  
971 *Biol* **152**, 429-453 (1991).
- 972 32. Jaeger, J., *et al.* Dynamic control of positional information in the early Drosophila embryo.  
973 *Nature* **430**, 368-371 (2004).
- 974 33. Manu, *et al.* Canalization of gene expression in the Drosophila blastoderm by gap gene  
975 cross regulation. *PLoS Biol* **7**, e1000049 (2009).
- 976 34. McHale, P., Rappel, W. J. & Levine, H. Embryonic pattern scaling achieved by oppositely  
977 directed morphogen gradients. *Phys Biol* **3**, 107-120 (2006).
- 978 35. Gregor, T., Wieschaus, E. F., McGregor, A. P., Bialek, W. & Tank, D. W. Stability and  
979 nuclear dynamics of the bicoid morphogen gradient. *Cell* **130**, 141-152 (2007).
- 980 36. Stauber, M., Taubert, H. & Schmidt-Ott, U. Function of bicoid and hunchback homologs  
981 in the basal cyclorrhaphan fly *Megaselia* (Phoridae). *Proc Natl Acad Sci U S A* **97**,  
982 10844-10849 (2000).
- 983 37. Wotton, K. R., *et al.* Quantitative system drift compensates for altered maternal inputs to  
984 the gap gene network of the scuttle fly *Megaselia abdita*. *Elife* **4**, (2015).
- 985 38. Wotton, K. R., Jimenez-Guri, E. & Jaeger, J. Maternal co-ordinate gene regulation and  
986 axis polarity in the scuttle fly *Megaselia abdita*. *PLoS Genet* **11**, e1005042 (2015).

987 39. Pankratz, M. J., Hoch, M., Seifert, E. & Jackle, H. Kruppel requirement for knirps  
988 enhancement reflects overlapping gap gene activities in the Drosophila embryo. *Nature*  
989 **341**, 337-340 (1989).  
990
